1  
2  
3  
4  
5  
6  
7  
8  
9  
10  
11  
12  
13  
14  
15  
16  
17  
18  
19  
20  
21  
22  
23

## Experience-dependent plasticity in an innate social behavior is mediated by hypothalamic LTP

Stefanos Stagkourakis<sup>1\*</sup>, Giada Spigolon<sup>2</sup>, Grace Liu<sup>1</sup>, David J. Anderson<sup>1,3\*</sup>

<sup>1</sup> Division of Biology and Biological Engineering 156-29, Tianqiao and Chrissy Chen Institute for Neuroscience, California Institute of Technology, Pasadena, California 91125, USA

<sup>2</sup> Biological Imaging Facility, California Institute of Technology, Pasadena, California 91125, USA

<sup>3</sup> Howard Hughes Medical Institute, California Institute of Technology, 1200 East California Blvd, Pasadena, California 91125, USA

**\*Corresponding author information:** Stefanos Stagkourakis, David J. Anderson

**Email:** [stefanos.stagkourakis@caltech.edu](mailto:stefanos.stagkourakis@caltech.edu), [wuwei@caltech.edu](mailto:wuwei@caltech.edu)

**ORCID:** Stefanos Stagkourakis ORCID; 0000-0003-1218-791X

Giada Spigolon ORCID; 0000-0002-1704-8372

**Classification:** Biological Sciences, Neuroscience

**Keywords:** innate behaviors, long term potentiation, ventromedial hypothalamus, testosterone

**Author Contributions:** S.S., G.S., and G.L. designed, performed and analyzed experiments. D.J.A. designed experiments. S.S. and D.J.A. wrote the manuscript. All authors reviewed the manuscript.

**Competing interests:** The authors declare no competing financial interests.

24 **Abstract**

25 All animals can perform certain survival behaviors without prior experience, suggesting a “hard wiring” of  
26 underlying neural circuits. Experience, however, can alter the expression of innate behaviors. Where in  
27 the brain and how such plasticity occurs remains largely unknown. Previous studies have established the  
28 phenomenon of “aggression training,” in which the repeated experience of winning successive aggressive  
29 encounters across multiple days leads to increased aggressiveness. Here we show that this procedure  
30 also leads to long-term potentiation (LTP) at an excitatory synapse, derived from the Anterior  
31 Hippocampus/Posterior Medial amygdala (AHiPM), onto estrogen receptor 1-expressing (Esr1<sup>+</sup>) neurons  
32 in the ventrolateral subdivision of the ventromedial hypothalamus (VMHvl). We demonstrate further that  
33 the optogenetic induction of such LTP *in vivo* facilitates, while optogenetic long-term depression (LTD)  
34 diminishes, the behavioral effect of aggression training, implying a causal role for potentiation at  
35 AHiPM→VMHvl<sup>Esr1</sup> synapses in mediating the effect of this training. Interestingly, ~25% of inbred  
36 C57BL/6 mice fail to respond to aggression training. We show that these individual differences are  
37 correlated both with lower levels of testosterone, relative to mice that respond to such training, and with  
38 a failure to exhibit LTP *in vivo* after aggression training. Administration of exogenous testosterone to  
39 such non-aggressive mice restores both behavioral and physiological plasticity *in vivo*. Together, these  
40 findings reveal that LTP at a hypothalamic circuit node mediates a form of experience-dependent  
41 plasticity in an innate social behavior, and a potential hormone-dependent basis for individual differences  
42 in such plasticity among genetically identical mice.

43 **Significance Statement**

44 Modification of instinctive behaviors occurs through experience, yet the mechanisms through which this  
45 happens have remained largely unknown. Recent studies have shown that potentiation of aggression,  
46 an innate behavior, can occur through repeated winning of aggressive encounters. Here we show that  
47 synaptic plasticity at a specific excitatory input to a hypothalamic cell population is correlated with, and  
48 required for, the expression of increasingly higher levels of aggressive behavior following successful  
49 aggressive experience. We additionally show that the amplitude and persistence of long-term potentiation  
50 at this synapse are influenced by serum testosterone, administration of which can normalize individual  
51 differences among genetically identical inbred mice, in the expression of intermale aggression.

## 52 **Introduction**

53 Brains evolved to optimize the survival of animal species by generating appropriate behavioral responses  
54 to both stable and unpredictable features of the environments in which they live. Accordingly, two major  
55 brain strategies for behavioral control have been selected. In the first, developmentally specified neural  
56 circuits generate rapid innate responses to sensory stimuli that have remained relatively constant and  
57 predictable over evolutionary timescales (1-5). In the second, neural circuits generate flexible responses  
58 to stimuli that can change over an individual's lifespan, through learning and memory (6-8).

59 One prevailing view is that these two strategies are implemented largely through distinct  
60 neuroanatomical structures and neurophysiological mechanisms. According to this view, in the  
61 mammalian brain innate behaviors are mediated by evolutionarily ancient, deep subcortical structures,  
62 such as the medial amygdala and hypothalamus, which link specific sensory inputs to evolutionarily  
63 "prepared" motor outputs through relatively stable synaptic connections (9-13). In contrast, learned  
64 behaviors are mediated by more recently evolved structures, such as the cortex and hippocampus, which  
65 compute flexible input-output mapping responses through synaptic plasticity mechanisms (14-19).

66 The idea that innate vs. learned behaviors are mediated by largely distinct neural systems has  
67 been reinforced by studies that have revealed, for example, distinct anatomical pathways through which  
68 olfactory cues evoke learned vs. innate behaviors in both the mouse (20-22) and in *Drosophila* (23-25);  
69 reviewed in (26). The concept of a dichotomous nervous system architecture for mediating appropriate  
70 biological responses to evolutionarily ancient vs. novel stimuli is analogous to the innate vs. adaptive  
71 branches of the immune system (27).

72 This view of distinct neural pathways for innate vs. learned behaviors, however, is challenged by  
73 case of behaviors that, while apparently "instinctive", can nevertheless be modified by experience. For  
74 example, while aggression has been considered by classical ethologists as a prototypical "released"  
75 innate behavior (28, 29), studies from the 1940's onwards showed that mice could be trained to be more  
76 aggressive by repeated fighting experience (30-35). Similarly, studies in rodents have shown that

77 defensive behaviors such as freezing can be elicited by both unconditional and conditional stimuli, the  
78 latter via Pavlovian associative learning (reviewed in (36)).

79         These observations raise the question of where in the brain, and how, the neural circuitry that  
80 mediates innate behaviors is modified by experience. In the case of defensive behaviors, such as  
81 freezing, the prevailing view argues for parallel pathways: conditioned defensive behavior is mediated by  
82 circuitry involving the hippocampus, thalamus and the basolateral/central amygdala, whereas innate  
83 defensive responses to predators are mediated by the medial amygdala (MeA)/bed nucleus of the stria  
84 terminalis (BNST) and hypothalamic structures (reviewed in (37)). Although the basolateral amygdala  
85 contains representations of unconditioned aversive and appetitive stimuli, these representations are used  
86 as the cellular substrate for pairing with conditioned stimuli (38, 39). Despite this segregation of learned  
87 and innate defensive pathways, it remains possible that experience-dependent influences on other innate  
88 behaviors may involve plasticity at synapses that directly mediate such behaviors (e.g., at inputs to  
89 midbrain PAGvl neurons (40)).

90         We have investigated this issue using inter-male offensive aggression in mice as an experimental  
91 paradigm. While mice housed under appropriate conditions can exhibit aggression in the absence of any  
92 prior agonistic encounters with male conspecifics (31, 33, 41), an effect of repeated successful  
93 aggressive experience to facilitate, or “prime”, subsequent attack behavior, considered as a form of  
94 “aggression training”, has been well-documented (42, 43). The neural substrate and physiological  
95 mechanisms underlying this form of experience-dependent plasticity of an innate behavior remain  
96 unknown. Interestingly, inbred strains of laboratory mice exhibit individual differences in the ability to  
97 manifest this form of behavioral plasticity, with up to 25% of animals failing to respond to aggression  
98 training (35). The biological basis of this apparent epigenetic heterogeneity is not understood. Here we  
99 provide data supporting a plausible explanation for both observations, one that links physiological  
100 plasticity at hypothalamic synapses to aggressive behavior and sex hormone levels.

101 **Results**

102 **Aggression training increases VMHvl<sup>Esr1</sup> neuron activity.** Aggression levels escalate following the  
103 recurrent manifestation of the behavior (35, 44, 45), an effect termed here as “aggression training”. Using  
104 a five consecutive-day resident-intruder assay (5cdRI, Fig. 1A), aggression training was investigated in  
105 a cohort of C57BL/6 *Esr1*-Cre mice (n=138), which displayed increased aggression levels that remained  
106 significantly elevated, relative to pre-training animals, over a prolonged period of time (maximal period  
107 tested – three months, Fig. 1C-F). This assay enabled the identification of socially naïve, aggressive  
108 (AGG), and non-aggressive (NON) mice, the latter of which represent ~23% of all males tested (Fig. 1B).  
109 Aggression levels were found to plateau on the fourth and fifth day of the 5cdRI, suggestive of a ceiling  
110 effect in the expression of aggressive behavior (Fig. 1C-E). Interestingly, aggression levels remained  
111 elevated for the maximal follow-up period tested (three months) following aggression training, as  
112 compared to the first instance of resident-intruder (RI) test (Fig. 1C).

113 To test whether aggression training involves plasticity in a structure that mediates the innate aspect of  
114 aggression (46), we initially focused on VMHvl<sup>Esr1</sup> neurons, optogenetic stimulation of which can evoke  
115 attack in socially naïve, inexperienced animals (47). Using brain slice Ca<sup>2+</sup> imaging, the average baseline  
116 activity of VMHvl<sup>Esr1</sup> neurons was found to increase in AGGs but not in NONs, following aggression  
117 training (Fig. 1G-J). Voltage-clamp *ex vivo* VMHvl<sup>Esr1</sup> neuron recordings revealed in AGG mice a  
118 significant increase in the frequency and amplitude of spontaneous excitatory postsynaptic currents  
119 (sEPSCs, Fig. 2A-C), relative to socially naïve animals. The increase in the amplitude of sEPSCs raised  
120 the possibility that a synaptic potentiation mechanism may be present in VMHvl<sup>Esr1</sup> neurons (48, 49). In  
121 contrast, voltage-clamp *ex vivo* VMHvl<sup>Esr1</sup> neuron recordings in slices from NON mice revealed an  
122 increase in the frequency and amplitude of spontaneous inhibitory postsynaptic currents (sIPSCs, Fig.  
123 S1).

124 The increased activity of VMHvl<sup>Esr1</sup> neurons following aggression training in AGG mice prompted us to  
125 investigate whether this might involve potentiation of an excitatory input to these cells. Anatomical studies

126 have identified a strong purely excitatory input to VMHv<sup>Esr1</sup> cells, which originates anatomically from the  
127 posteromedial part of the amygdalohippocampal area (AHiPM, also termed the posterior amygdala, PA)  
128 (50). *In vivo* optogenetic activation of AHiPM evoked aggression (Fig. 2D-H), confirming a recent report  
129 using chemogenetic activation (51). We found, moreover, that this effect is amplified in aggression-  
130 experienced animals (Fig. 2D-H). Investigation of the functional connectivity at AHiPM→VMHv<sup>Esr1</sup>  
131 synapses in acute slices using optogenetic activation of AHiPM inputs (Fig. 2I-K) indicated that this  
132 projection is entirely excitatory, at least in part monosynaptic (Fig. S2), with an absence of any evoked  
133 responses at the reversal potential for excitation ( $V_m$  hold = 0 mV, Fig. 2J – middle row) and reliable  
134 photostimulation-evoked currents at the reversal potential for inhibition ( $V_m$  hold = -70 mV, Fig. 2J –  
135 bottom row). These observations raised the question of whether potentiation at AHiPM→VMHv<sup>Esr1</sup>  
136 synapses underlies the observed increase in the excitatory synaptic input onto VMHv<sup>Esr1</sup> neurons  
137 recorded from AGG mice following aggression training.

138

139 **Plasticity at a hypothalamic synapse following aggression training.** At the postsynaptic side of  
140 synapses that can undergo LTP, the response to stimulation of excitatory pre-synaptic inputs largely  
141 depends on the ratio of N-methyl-D-aspartate (NMDA) and  $\alpha$ -amino-3-hydroxy-5-methyl-4-  
142 isoxazolepropionic acid (AMPA) receptors (52, 53). To test whether the AHiPM→VMHv<sup>Esr1</sup> synapse  
143 undergoes potentiation following aggression training, therefore, we measured the AMPA/NMDA ratio (54-  
144 56). This analysis revealed a significantly higher AMPA/NMDA ratio in AGGs following such training,  
145 compared to socially naive and NON mice (Fig. 2K). As the AMPA/NMDA ratio can influence synaptic  
146 integration properties (57), we also investigated synaptic integration in VMHv<sup>Esr1</sup> neurons from socially  
147 naive, AGG (trained) and NON mice. Indeed, these three groups of animals exhibited distinct synaptic  
148 integration properties, with depressing/static synaptic integration in socially naive and NON mice, and  
149 facilitating synaptic integration in the VMHv<sup>Esr1</sup> neurons of AGG (trained) mice (Fig. 2L, M).

150 Changes in the AMPA/NMDA ratio and synaptic integration properties are often accompanied by changes  
151 in neuronal morphology and dendritic spine complexity, which can be indicative of structural LTP (sLTP)  
152 (58-62). To investigate this possibility, VMHvl<sup>Esr1</sup> neurons which exhibited an increase in the  
153 AMPA/NMDA ratio and synaptic integration in acute slice preparations were filled with neurobiotin, and  
154 super-resolution images for reconstruction were obtained using the Airyscanning technique in a ZEISS  
155 LSM 880 (63, 64). Analysis of second-order dendritic segments identified a prominent increase in  
156 dendritic arborizations in VMHvl<sup>Esr1</sup> neurons from AGG (trained) mice, in comparison to socially naive and  
157 NON mice (Fig. 3A-L). These changes were reflected in most spine parameters measured, including  
158 density, branching points, volume, area, length, and mean diameter (Fig. 3M-R). However, the principal  
159 feature was an increase in the number of short-length spines, suggesting they were newly generated  
160 during or after training. Collectively, these observations suggested the possibility that potentiation is likely  
161 to occur at AHiPM→VMHvl<sup>Esr1</sup> synapses, following aggression training in susceptible animals. We  
162 therefore pursued this possibility using more specific electrophysiological protocols.

163

164 **Experimental induction of LTP and LTD at AHiPM→VMHvl<sup>Esr1</sup> synapses.** LTP and LTD can be  
165 experimentally induced in slices from brain areas typically associated with higher cognitive processing  
166 (65-70), such as the hippocampus, but few studies have demonstrated that this can occur in the  
167 hypothalamus (71-73), a site traditionally considered the source of instincts.

168 To determine whether LTP can be experimentally induced at AHiPM→VMHvl<sup>Esr1</sup> synapses *ex vivo*, we  
169 employed acute VMHvl slices, and used an optogenetics protocol composed of three bouts of  
170 photostimulation of Chronos-expressing AHiPM terminals, during which the VMHvl<sup>Esr1</sup> neuron (identified  
171 by Cre-dependent expression of tdTomato in Esr1-Cre mice) was voltage-clamped at a depolarized  
172 membrane potential (-30 mV; Fig. 4A, 4B). The choice of this Hebbian stimulation protocol was based on  
173 our initial finding that combined pre- and post-synaptic depolarization were necessary for induction of



174 potentiation at AHiPM→VMHv<sup>Esr1</sup> synapses (Fig. S3) (74). The stimulation frequency of AHiPM terminals  
175 used here (20 Hz) was chosen based on our previous demonstration that direct optogenetic stimulation  
176 of VMHv<sup>Esr1</sup> neurons at this same frequency drives action potential firing with 100% spike fidelity *ex vivo*  
177 as well as *in vivo*, without depolarization block (47), and that it produces reliable synaptic integration in  
178 VMHv<sup>Esr1</sup> neurons (Fig. 2L, M). *Ex vivo* whole-cell voltage-clamp recordings composed of 20 min baseline  
179 and 20 min follow-up, revealed that the majority of VMHv<sup>Esr1</sup> neurons recorded in slices from socially  
180 naive, AGG (trained) and NON mice were able to express synaptic potentiation in response to this  
181 manipulation (Fig. 4C). Comparison of the responses with the animals' aggression phenotypes revealed,  
182 however, that the dynamics of the response, including its maximum amplitude and persistence, differed  
183 between groups, with synaptic potentiation in slices from NON mice returning to baseline levels within  
184 the maximal period tested (20 min, Fig. 4D). Based on the Hebbian conditions required to evoke this form  
185 of synaptic potentiation, and the similarity of its features to LTP as characterized in the hippocampus (75,  
186 76), we refer to this form of plasticity as hypothalamic LTP.

187 These findings in turn raised the question of whether AHiPM→VMHv<sup>Esr1</sup> synapses can also express long-  
188 term synaptic depression (LTD). This was investigated using a longer stimulation protocol for activating  
189 AHiPM terminals (10 min continuous stimulation at 1Hz, Fig. 4E). Similar to the case of LTP, most  
190 VMHv<sup>Esr1</sup> neurons expressed LTD of varying amplitude and dynamics, in a manner that varied with the  
191 animals' aggression phenotypes (Fig. 4F, 4G). Interestingly, VMHv<sup>Esr1</sup> cells from NON mice expressed  
192 higher amplitude LTD (Fig. 4G) than did cells from other groups.

193 An important question raised by these *ex vivo* observations was whether LTP and LTD can be induced  
194 at AHiPM→VMHv<sup>Esr1</sup> synapses *in vivo*, using either optogenetic stimulation or aggression training. To  
195 study the optogenetic induction of LTP *in vivo*, we used a similar paradigm to the *ex vivo* stimulation  
196 protocol (Fig. 4A, 4H). However, in order to be able to simultaneously depolarize both pre- and post-  
197 synaptic terminals we used spectrally segregated opsins with an overlap at 535 nm, to permit co-  
198 excitation (77). As in the case of the *ex vivo* experiments, AHiPM was transduced with Chronos; in

199 addition, VMHvl<sup>Esr1</sup> neurons were transduced with ChrimsonR (Fig. 4H). Chronic implantation of a silicon  
200 probe optrode in the VMHvl allowed the detection of optically induced LTP or LTD in individual freely-  
201 moving mice in their home cage, as a change in AHiPM stimulation-evoked local field potentials (fEPSPs;  
202 Fig. 4I-4K). Application of the Hebbian protocol in socially naive mice led to the robust expression of LTP  
203 in VMHvl *in vivo* (Fig. 4L), while application of the spaced protocol led to robust expression of LTD (Fig.  
204 4M). Although VMHvl<sup>Esr1</sup> neurons in silicon probe recordings were identified by optogenetic photo-tagging  
205 of post-synaptic cells, we cannot exclude that other classes of VMHvl neurons contribute to recorded  
206 fEPSPs.

207 These findings in turn raised the question of whether LTP can be induced *in vivo* by aggression training.  
208 Applying the same testing method used to analyze the optogenetic induction of *in vivo* LTP and LTD, the  
209 field excitatory postsynaptic potential (fEPSP) was monitored during a 10 min baseline period and then  
210 following aggression training in initially socially naive mice. We used test optogenetic pulses to briefly  
211 activate AHiPM terminals and ask whether the fEPSP increased in amplitude following the expression of  
212 aggression. Indeed, LTP was induced in VMHvl<sup>Esr1</sup> neurons immediately after the expression of social  
213 behavior and aggression (Fig. 4N-P, n=4 mice tested). Notably, the behavioral induction of LTP (Fig. 4O),  
214 led to a persistent change in the amplitude of the fEPSP. This might suggest a lack of an early- vs late-  
215 phase distinction in the LTP at AHiPM→VMHvl<sup>Esr1</sup> synapses, in contrast to LTP features observed at  
216 defined synapses in the hippocampus and the amygdala (78, 79).

217 The above findings identify hypothalamic synaptic plasticity, and specifically LTP and LTD, as  
218 mechanisms that can occur and can alter VMHvl<sup>Esr1</sup> neuronal excitability *in vivo*. Next we sought to  
219 address whether LTP and LTD have a causal role in the behavioral effect of aggression training.

220

221 **LTP facilitates and LTD inhibits potentiation of aggression following aggression training.** To  
222 address whether LTP in the AHiPM→VMHvl<sup>Esr1</sup> synapses can influence the expression of aggression in

223 inexperienced animals, we performed an *in vivo* optogenetic manipulation using the approach we  
224 established for the experimental induction of hypothalamic LTP *in vivo*. The AHiPM of Esr1-Cre mice was  
225 transduced with Chronos or YFP, while VMHv<sup>Esr1</sup> neurons were transduced with Cre-dependent  
226 ChrimsonR or mCherry (Fig. S4A). The effects of these manipulations were investigated behaviorally,  
227 not physiologically, therefore silicon recording probes were not implanted.

228 Following application of the LTP induction protocol over three consecutive days in socially naïve, solitary  
229 mice, the RI test was performed on the fourth day, and behavior was quantified (Fig. S4B-G). The opsin  
230 expressing mice (LTP group), exhibited elevated levels of aggression, indicating that the experimental  
231 induction of LTP in this particular projection *in vivo* can influence the expression of aggression in the  
232 absence of prior social experience (Fig. S4D-G).

233 The above paradigm was further modified to test, whether LTP and LTD can exert a causal influence on  
234 aggression training. Using the approach we established for the experimental induction of hypothalamic  
235 LTP or LTD *in vivo* (Fig. 4K-M), the AHiPM of Esr1-Cre mice was transduced with Chronos or YFP, while  
236 VMHv<sup>Esr1</sup> neurons were transduced with Cre-dependent ChrimsonR or mCherry (Fig. 5A) and the effects  
237 of these manipulations were investigated behaviorally.

238 The 5cdRI test was used to investigate the possible influence of LTP and LTD on aggression training. In  
239 one experiment, to determine whether LTP could facilitate aggression training, the LTP induction protocol  
240 was delivered at the end of each RI trial in both the control (YFP/mCherry-expressing) and LTP groups.  
241 In a separate experiment, to determine whether LTP was necessary for aggression training, the LTD  
242 induction protocol was delivered at the end of each RI trial in the control and LTD groups (Fig. 5B);  
243 application of LTD is expected to override any LTP that may have occurred (80). As in Fig. 1A, smaller  
244 size BALB/c intruders were introduced to Esr1-Cre residents, in which the LTP/LTD protocols were  
245 optogenetically delivered (Fig. 5C). Aggression levels were recorded and analyzed on each day of the  
246 5cdRI (i.e., 24 hrs following the previous LTP or LTD manipulation, with the exception of day one).

247 Applying LTP or LTD induction protocols *in vivo* facilitated or diminished the behavioral effect of  
248 aggression training, respectively, as quantified by aggression/trial (% of the total trial duration occupied  
249 by aggressive behavior) and attack latency (Fig. 5D-K). Interestingly, although LTP was found to enhance  
250 the behavioral effect of aggression training on the second and third day of the 5cdRI assay, it did not lead  
251 to ever-increasing aggression levels; rather the effect plateaued on days four and five, at a level similar  
252 to the control group (see also Fig. 1C), suggesting an effect to accelerate learning. In contrast, LTD had  
253 a profound inhibitory effect on aggression training, leading to similar aggression levels between day one  
254 and day five of the 5cdRI test (Fig. 5D, two-tailed paired *t*-test,  $P = 0.0592$  between day one and day five  
255 in the LTD group).

256 We investigated next whether the observation that control and LTP-induced groups expressed similar  
257 levels of aggressive behavior following training day three is due to a “ceiling effect” in the aggression  
258 training paradigm. To do this, we performed further tests following completion of the 5cdRI training  
259 routine. On day six, mouse social behavior was tested in a novel arena against a CD1 male conspecific  
260 of larger size (Fig. 5B, 5C), under which condition aggressive resident mice are less likely to attack (81).  
261 We reasoned that LTP mice that reached “ceiling” levels of aggression in the 5cdRI assays using  
262 conventional, smaller subordinate intruders might nevertheless show higher aggression under these sub-  
263 optimal conditions.

264 Indeed, under these conditions, the 5cdRI/LTP-treated mouse group exhibited higher aggression levels  
265 than any other tested group, while the control and LTD groups expressed similar aggression levels (Fig.  
266 5L-O). This finding suggests that hypothalamic LTP expressed by VMHvl<sup>Esr1</sup> neurons can facilitate  
267 aggression under modified conditions where resident aggressiveness is behaviorally reduced, relative to  
268 that typically detected in our conventional RI assay.

269 Together these experiments demonstrate a potential role for LTP and LTD in AGG mice. We next  
270 investigated the basis for individual differences in aggression training among genetically identical mice,

271 by asking whether we could identify any experimental intervention that would allow aggression and/or  
272 hypothalamic LTP to be expressed in NON mice.

273

274 **Testosterone enables the expression of aggression and hypothalamic LTP in NON mice.** Levels of  
275 testosterone (T) have been suggested to correlate with aggression and dominance in numerous species  
276 (82-90), while administration of T following castration or ovariectomy has been shown to restore  
277 aggression to the animal's behavioral repertoire (91-96). As T levels are subject to epigenetic influences  
278 (97), we sought to determine whether individual differences in levels of the hormone were detectable  
279 among genetically identical, inbred C57BL/6N mice, and if so whether they correlated with and were  
280 responsible for individual differences in the capacity to undergo aggression training.

281 To investigate whether serum T levels differ between NON and AGG mice, we collected blood samples  
282 at different time points of the 5cdRI test (Fig. 6A-D). This experiment revealed that prior to the experience  
283 of aggression, a small but statistically significant ( $P < .05$ ) difference in serum T is present between NON  
284 and AGG mice (Fig. 6B). This difference between the two groups was further accentuated following  
285 aggression training (Fig. 6C). This is because serum T levels remained unaltered following aggression  
286 training in NON mice, whereas they increased in AGG mice following training (Fig. 6D). Interestingly the  
287 increase in serum T in AGG mice occurred in the first three days, and was not further accentuated through  
288 additional aggression training (Fig. 6D). Together, these data reveal a correlation between individual  
289 differences in T and the ability to respond to aggression training in NON vs. AGG mice, as well as between  
290 levels of aggressiveness and T levels in AGG mice during training.

291 To test whether T levels are causally responsible for the difference in aggressiveness between NON and  
292 AGG mice, subcutaneous osmotic mini-pumps containing T or vehicle were implanted in NON mice (Fig.  
293 6E). The serum T levels in NONs measured at seven days post T mini-pump implantation were  
294 significantly higher than (but within the upper quartile of) the endogenous T levels measured in AGG mice

295 following completion of the 5cdRI training (Fig. 6D, F, serum T in NONs following T administration through  
296 mini-pump  $39.22 \pm 2.73$  ng/mL, serum T in AGGs following aggression training  $16.61 \pm 1.01$  ng/mL,  $n=6$   
297 and 46 mice respectively, two-sided Mann–Whitney U test,  $P < 0.0001$ ). Strikingly, the administration of  
298 exogenous T induced aggression in all NON mice tested (Fig. 6G–J). We next investigated whether the  
299 emergence of aggression through T administration correlated with the expression of LTP. In acute VMHvl  
300 slices from vehicle vs T-treated NON mice, we investigated the induction and expression of LTP using  
301 *ex vivo* recordings. Using the same Hebbian induction protocol, stronger LTP could be elicited from  
302 VMHvl<sup>Esr1</sup> neurons recorded in slices from T-treated NON mice, in comparison to those from vehicle-  
303 treated NON mice (Fig. 6K–O). Thus, T implants facilitate LTP induction *ex vivo* in NON mice.

304 An important remaining question, however, was whether LTP was expressed in VMHvl<sup>Esr1</sup> neurons *in*  
305 *vivo*, following aggression training in T-treated NON mice. To address this question, we used the design  
306 previously described in Fig. 4H, N, in which AHiPM was transduced with Chronos, while VMHvl<sup>Esr1</sup> cells  
307 were transduced with ChrimsonR. A novel BALB/c, small size male intruder was introduced into the  
308 NON's home cage (Fig. 6P). In vehicle-treated mice, social interactions with intruder mice, but no  
309 aggression, were observed, and LTP did not occur *in vivo*, as measured by fEPSP recordings in response  
310 to optogenetic stimulation of Chronos-expressing AHiPM terminals (Fig. 6Q–T). However, T  
311 administration through subcutaneous osmotic mini-pumps led to the expression of both aggressive  
312 behavior and *in vivo* behaviorally induced LTP, in NON mice (Fig. 6Q–T).

313 These findings suggest that individual differences in serum T are responsible, at least in part, for  
314 individual differences in the capacity for aggression training amongst inbred mice. Elevation of serum T  
315 in NON mice can restore susceptibility to aggression training, as well as the capacity to express strong  
316 LTP at AHiPM→VMHvl<sup>Esr1</sup> synapses (both *ex vivo* and *in vivo* following aggression training). This  
317 observation further strengthens the correlation between the ability to respond positively to aggression  
318 training, and the expression of LTP. However, it does not distinguish whether the enhanced LTP in NON

319 mice is directly caused by T treatment, or rather is an indirect effect of the increased aggression promoted  
320 by the hormone implants.

321

## 322 **Discussion**

323 A prevailing view in neuroscience is that anatomically distinct neural systems mediate innate vs. learned  
324 behaviors: the former are thought to be processed by “labelled lines,” developmentally hard-wired circuits  
325 in evolutionarily ancient, deep subcortical structures such as the hypothalamus (13, 98, 99); in contrast,  
326 the latter engage synaptic plasticity mechanisms in more recently evolved brain structures, such as the  
327 neocortex and hippocampus. Reflecting this view, in the mammalian brain the vast majority of studies of  
328 synaptic plasticity mechanisms, such as LTP and LTD, have been performed in the latter structures (as  
329 well as in the cerebellum (100-102). Whether such mechanisms also operate in deep subcortical  
330 structures, and if so, what types of behavioral plasticity (if any) they might subserve, has remained  
331 unclear. However, this knowledge gap reflects an absence of evidence, more than evidence of absence.

332 Here we have identified and deconstructed the neural substrate and physiological mechanism  
333 underlying a form of experience-dependent plasticity in aggression, a prototypic innate social behavior.  
334 We show that a training paradigm that increases aggressiveness via repeated successful agonistic  
335 encounters is correlated with, enhanced by and dependent upon, LTP operating at a glutamatergic  
336 synapse on a population of hypothalamic  $Esr1^+$  neurons that mediates innate aggressive behavior (47).  
337 The plasticity observed at  $AHiPM \rightarrow VMHvl^{Esr1}$  synapses likely has both post- and pre-synaptic  
338 components, as suggested by an increase in the AMPAR/NMDAR ratio (54-56) following aggression  
339 training (Fig. 2J, K), and by the differential responses of  $VMHvl^{Esr1}$  neurons to trains of pre-synaptic stimuli  
340 (103, 104) (Fig. 2L, M), respectively. Surprisingly, the form of hypothalamic LTP studied here does not  
341 exhibit “occlusion,” phenomenon observed in studies of hippocampal or amygdalar LTP (105, 106), in  
342 which following *in vivo* behavioral induction of LTP in the synaptic population of interest, the magnitude  
343 of LTP that can be induced subsequently *ex vivo* is markedly decreased (Fig. 4D, K). Similarly, we do



344 not observe the related phenomenon in which prior *in vivo* LTP can enhance the extent of LTD that can  
345 be induced *ex vivo* in slices from such animals. The reason(s) for the failure to observe these phenomena  
346 are not clear, and will require further studies to elucidate. There are a number of effects, however, which  
347 could account for these observations. Firstly, it is possible that the proportion of synapses modified by  
348 the *in vivo* social experience was small compared to the synapses being sampled in the slice. Another  
349 possibility is that the synapses being assayed in the slice are a different population than the ones modified  
350 *in vivo*, or lastly that new synapses were formed by the *in vivo* experience and they are the ones primarily  
351 contributing to the LTP and LTD being measured *in vitro*. This last possibility is of particular interest,  
352 given that - as presented in Fig. 3, an increase in spine density occurs in VMHvl<sup>Esr1</sup> neurons of AGG mice.

353 The data on LTP presented here, blur the distinction between neural circuits mediating learned  
354 vs. innate behaviors, and reinforce the concept of “learned innate behavior,” in which synaptic plasticity  
355 within developmentally hardwired circuits can function to modify the strength of an instinctive behavior in  
356 response to social experience. An example of the latter in an invertebrate is the post-mating response in  
357 *Drosophila*, a form of memory in which female sexual receptivity is inhibited following mating (107-109).  
358 Interestingly, recent studies have blurred the classic distinction between the innate and adaptive immune  
359 systems as well (110, 111).

360 This idea notwithstanding, more complex forms of learning, such as classical or operant  
361 conditioning, may utilize circuits that are parallel to those that mediate innate forms of the modified  
362 behavior, as shown in the case of conditioned vs. unconditioned fear (112-114). In this context, it is worth  
363 noting that mice can learn an instrumental, operant response using successful aggressive encounters as  
364 a reinforcer (115), and that performance of this instrumental task is facilitated by optogenetic activation  
365 of VMHvl neurons (116). The neural substrates and synaptic mechanisms underlying this operant  
366 conditioning remain to be elucidated, although the nucleus accumbens-based reward system has been  
367 implicated in recent studies (117).



368 Aggressiveness can be enhanced not only by repeated successful agonistic encounters, as  
369 shown here, but also by prior mating experience (118). Recently, we showed that as little as 30 minutes  
370 of free social interaction with a female was sufficient to transform a socially naïve mouse into an AGG  
371 mouse within 24 hrs of the interaction (119). This effect was associated with a change in the neural  
372 representation of male vs. female conspecifics among VMHvl<sup>Esr1</sup> neurons, from partially overlapping to  
373 largely non-overlapping (119). Whether this change in neural population coding involves synaptic  
374 plasticity within VMHvl, or is inherited from upstream structures, such as the MeA (120), remains to be  
375 determined. In other studies, we have shown that the effect of social isolation stress to promote  
376 aggression in non-sexually experienced males is mediated by the neuropeptide Neurokinin B (NkB) and  
377 its receptor Nk3R, acting in the dorso-medial hypothalamus (DMH) (121). The relationship of this form of  
378 experience-dependent plasticity to VMHvl<sup>Esr1</sup> neuronal activity is currently unknown.

379 Our current findings also provide insights into individual differences in the ability of genetically  
380 identical animals to respond to “aggression training”. Firstly, we show here that several physiological  
381 parameters in AGG mice are different from those in socially naïve mice. These include elevated baseline  
382 VMHvl<sup>Esr1</sup> neuron activity (Fig. 1G-J), increased spontaneous excitatory input onto VMHvl<sup>Esr1</sup> neurons  
383 (Fig. 2A-C), increased AMPA/NMDA ratio at AHiPM→VMHvl<sup>Esr1</sup> synapses (Fig. 2I-K) and altered synaptic  
384 integration properties (Fig. L, M). By contrast, in NON mice the spontaneous inhibitory inputs to VMHvl<sup>Esr1</sup>  
385 neurons are increased, relative to socially naïve mice (Fig. S1). In addition, NON mice exhibit shorter  
386 lasting LTP and longer lasting LTD than are observed in AGG mice (Fig. 4D, G). Whether increased LTD  
387 is sufficient to account for the failure of NON mice to respond to aggression training is not yet clear.  
388 Another possibility, suggested by the increased spontaneous IPSCs, is that VMHvl receives stronger  
389 inhibitory input from GABAergic neurons in NON mice. While there are very few GABAergic neurons  
390 within VMHvl itself (122), VMHvl receives strong inhibitory input from the neighboring tuberal (TU) region.  
391 It is possible that the lack of aggression in NON mice reflects potentiation of these TU GABAergic  
392 neurons. Whether these TU neurons receive feed-forward input from VMHvl<sup>Esr1</sup> neurons, or from another

393 source, is not known. The synaptic mechanisms responsible for the lack of aggression in NON mice will  
394 clearly require further investigation.

395 We also find that NON mice – unsusceptible to aggression training, have low levels of circulating  
396 T in comparison to AGG mice, and experimental administration of supplemental T can restore the  
397 capacity for “aggression learning” in such animals. While the permissive role of T in promoting male  
398 aggressiveness is well-established (82, 86, 123-126), our studies provide new insight into the  
399 neurophysiological mechanisms that may mediate this effect in the context of aggression training.  
400 Specifically, we observe that NON animals can only express LTP *in vivo* following administration of  
401 exogenous T. Although LTP can be induced optogenetically *ex vivo* in slices from control NON animals,  
402 LTP in slices from T-implanted NON animals exhibited higher-amplitude and persistence. Moreover, in  
403 AGG mice levels of T increased during aggression training. This correlation suggests either that T acts  
404 directly to enhance LTP at this synapse, which in turn promotes aggression, or that T acts indirectly, by  
405 promoting aggressive behavior which in turn enhances LTP (Fig. S5). Whether T directly influences  
406 synaptic plasticity, and if so the underlying molecular mechanisms involved, as well as the mechanistic  
407 basis of individual differences in T levels, are interesting topics for future study.

408 Our experiments have focused on a specific glutamatergic input to VMHvl<sup>Esr1</sup> neurons which have  
409 a causal role in aggression. In addition to our finding, recent work reported that VMHvl-projecting Vglut<sup>+</sup>  
410 neurons in the AHiPM exhibited elevated c-fos expression following both social investigation and attack,  
411 while chemogenetic silencing of AHiPM neurons inhibited attack (51). VMHvl<sup>Esr1</sup> neurons receive inputs  
412 from neurons in over 30 different structures (50), raising the question of whether other inputs to these  
413 cells also display plasticity. Indeed, recently published work has identified synaptic plasticity promoted  
414 by foot-shock stress in a medial amygdala projection that primarily targets the central part of VMH (VMHc)  
415 (127). Although a causal role in promoting aggression was not directly demonstrated for this input, and  
416 the mechanism of potentiation was not established, plasticity at this synapse may regulate stress-induced  
417 aggression (127). The present study demonstrates that AHiPM → VMHvl<sup>Esr1</sup> synapses can undergo

418 Hebbian LTP, and that potentiation of these synapses occurs during social experience that enhances  
419 offensive aggression (47, 119). Together, these data suggest that VMHvl likely provides a substrate in  
420 which aggression plasticity can occur at multiple synaptic inputs, each of which may play distinct roles in  
421 physiology and/or behavior. Our results also reveal striking effects of aggression training on dendritic  
422 spine morphology among VMHvl<sup>Esr1</sup> neurons, although we cannot be certain whether the secondary  
423 dendritic branches where we observe this phenomenon receive synaptic input from AHiPM. Other recent  
424 studies have identified structural plasticity among VMHvl<sup>PR</sup>-derived axons innervating hypothalamic  
425 targets in females, which are mediated by changes in sex steroids during estrus (128). The present work,  
426 together with these other studies, begins to provide a view of the acute and dynamic changes that can  
427 occur through experience and/or hormonal modulation, in a brain node that controls innate social  
428 behaviors.

429         Historically, synaptic plasticity mechanisms – and in particular LTP, have been investigated  
430 predominantly in hippocampal circuits that mediate spatial learning (129-132), or in thalamo-amygdalar  
431 circuits that mediate Pavlovian associative conditioning (133-136). Both systems emphasize the role of  
432 LTP in allowing flexible neural circuits to mediate adaptive responses on fast time-scales, as expected  
433 for the recently evolved brain regions in which they operate. By contrast, studies of the hypothalamus  
434 have focused primarily on identifying circuits that mediate evolutionarily ancient, innate survival  
435 behaviors, with the expectation that such circuits would be comprised predominantly of relatively stable,  
436 hard-wired synaptic connections (13, 98, 99). Our results and other data suggest a reconsideration of  
437 this prevailing view of hypothalamic pathways as ‘hard-wired’ neural circuits. They suggest, moreover,  
438 that further investigation of synaptic plasticity mechanisms within neural pathways that control  
439 evolutionarily selected, robust survival behaviors, may yield new insights into both the physiological and  
440 hormonal regulation of such mechanisms, as well as the forms of behavioral plasticity that they ultimately  
441 subserve.

442

443

444 **Materials and Methods**

445 All experimental procedures involving the use of live animals or their tissues were carried out in  
446 accordance with the NIH guidelines and approved by the Institutional Animal Care and Use Committee  
447 and the Institutional Biosafety Committee at the California Institute of Technology (Caltech). *Esr1<sup>Cre/+</sup>*  
448 knock-in mice (47) backcrossed into the C57BL/6N background (>N10) were bred at Caltech. The  
449 *Esr1<sup>Cre/+</sup>* knock-in mouse line is available from the Jackson Laboratory (Stock no. 017911). Heterozygous  
450 *Esr1<sup>Cre/+</sup>* mice were used for all experiments and were genotyped by PCR analysis of tail DNA. Mice used  
451 as residents (see five consecutive-day resident–intruder assay) were individually housed. All wild-type  
452 mice used as intruders in resident–intruder assays and for behavioral experiments were of the  
453 BALB/cAnNCrl or Crl:CD1 (ICR) strain (Charles River Laboratories). Health status was normal for all  
454 animals. Antibodies, compounds, and the experimental procedures with the coordinates of all injection  
455 sites are described in [SI Appendix](#).

456

457 **Data Availability.** . All data discussed in the paper are available in the main text and [SI Appendix](#). We  
458 used standard MATLAB functions and publicly available software indicated in the manuscript for analysis.

459 **Acknowledgments.** The authors thank Dr. B. Weissbourd and Dr. L. Li for advice on experiments, Dr.  
460 Y. Ouadah and Dr. P. Williams for advice during writing of the manuscript, X. Da and J.S. Chang for  
461 technical assistance, X. Da and C. Chiu for laboratory management and G. Mancuso for administrative  
462 support. Members of the Anderson laboratory are thanked for discussion during the preparation of this  
463 manuscript. Confocal imaging was performed in the Biological Imaging Facility, with the support of the  
464 Caltech Beckman Institute and the Arnold and Mabel Beckman Foundation. This study was supported  
465 by NIH Grant R01 MH070053 to D.J.A., and the EMBO ALTF 736-2018 postdoctoral fellowship to S.S.  
466 D.J.A. is an investigator of the Howard Hughes Medical Institute.

467 **References**

- 468 1. J. Y. Kim, B. Cho, C. Moon, Timely Inhibitory Circuit Formation Controlled by Abl1 Regulates Innate  
469 Olfactory Behaviors in Mouse. *Cell reports* **30**, 187-201 e184 (2020).
- 470 2. M. Yilmaz, M. Meister, Rapid innate defensive responses of mice to looming visual stimuli. *Current biology*  
471 : *CB* **23**, 2011-2015 (2013).
- 472 3. Y. Wang *et al.*, Large-scale forward genetics screening identifies Trpa1 as a chemosensor for predator  
473 odor-evoked innate fear behaviors. *Nature communications* **9**, 2041 (2018).
- 474 4. K. Sokolowski *et al.*, Specification of select hypothalamic circuits and innate behaviors by the embryonic  
475 patterning gene dbx1. *Neuron* **86**, 403-416 (2015).
- 476 5. D. S. Manoli, G. W. Meissner, B. S. Baker, Blueprints for behavior: genetic specification of neural circuitry  
477 for innate behaviors. *Trends Neurosci* **29**, 444-451 (2006).
- 478 6. E. B. Anderson, I. Grossrubatscher, L. Frank, Dynamic Hippocampal Circuits Support Learning- and  
479 Memory-Guided Behaviors. *Cold Spring Harb Symp Quant Biol* **79**, 51-58 (2014).
- 480 7. E. Yavas, S. Gonzalez, M. S. Fanselow, Interactions between the hippocampus, prefrontal cortex, and  
481 amygdala support complex learning and memory. *F1000Res* **8** (2019).
- 482 8. P. Le Merre *et al.*, Reward-Based Learning Drives Rapid Sensory Signals in Medial Prefrontal Cortex and  
483 Dorsal Hippocampus Necessary for Goal-Directed Behavior. *Neuron* **97**, 83-91 e85 (2018).
- 484 9. G. B. Choi *et al.*, Lhx6 delineates a pathway mediating innate reproductive behaviors from the amygdala  
485 to the hypothalamus. *Neuron* **46**, 647-660 (2005).
- 486 10. J. C. Jimenez *et al.*, Anxiety Cells in a Hippocampal-Hypothalamic Circuit. *Neuron* **97**, 670-683 e676 (2018).
- 487 11. A. Perez-Gomez *et al.*, Innate Predator Odor Aversion Driven by Parallel Olfactory Subsystems that  
488 Converge in the Ventromedial Hypothalamus. *Current biology : CB* **25**, 1340-1346 (2015).
- 489 12. C. M. Root, C. A. Denny, R. Hen, R. Axel, The participation of cortical amygdala in innate, odour-driven  
490 behaviour. *Nature* **515**, 269-273 (2014).
- 491 13. J. Kohl *et al.*, Functional circuit architecture underlying parental behaviour. *Nature*, 1-21 (2018).
- 492 14. S. L. Brincat, E. K. Miller, Frequency-specific hippocampal-prefrontal interactions during associative  
493 learning. *Nature neuroscience* **18**, 576-581 (2015).
- 494 15. D. Huber *et al.*, Multiple dynamic representations in the motor cortex during sensorimotor learning.  
495 *Nature* **484**, 473-478 (2012).
- 496 16. K. A. McDowell *et al.*, Reduced cortical BDNF expression and aberrant memory in Carf knock-out mice.  
497 *The Journal of neuroscience : the official journal of the Society for Neuroscience* **30**, 7453-7465 (2010).
- 498 17. T. Wolansky, E. A. Clement, S. R. Peters, M. A. Palczak, C. T. Dickson, Hippocampal slow oscillation: a novel  
499 EEG state and its coordination with ongoing neocortical activity. *The Journal of neuroscience : the official*  
500 *journal of the Society for Neuroscience* **26**, 6213-6229 (2006).
- 501 18. Y. Goto, A. A. Grace, Dopamine-dependent interactions between limbic and prefrontal cortical plasticity  
502 in the nucleus accumbens: disruption by cocaine sensitization. *Neuron* **47**, 255-266 (2005).
- 503 19. M. L. Hayashi *et al.*, Altered cortical synaptic morphology and impaired memory consolidation in  
504 forebrain- specific dominant-negative PAK transgenic mice. *Neuron* **42**, 773-787 (2004).
- 505 20. D. L. Sosulski, M. L. Bloom, T. Cutforth, R. Axel, S. R. Datta, Distinct representations of olfactory  
506 information in different cortical centres. *Nature* **472**, 213-216 (2011).
- 507 21. K. Miyamichi *et al.*, Cortical representations of olfactory input by trans-synaptic tracing. *Nature* **472**, 191-  
508 196 (2011).
- 509 22. S. Ghosh *et al.*, Sensory maps in the olfactory cortex defined by long-range viral tracing of single neurons.  
510 *Nature* **472**, 217-220 (2011).
- 511 23. M.-J. Dolan *et al.*, Communication from Learned to Innate Olfactory Processing Centers Is Required for  
512 Memory Retrieval in Drosophila. *Neuron* **100**, 651-668.e658 (2018).

- 513 24. G. S. Jefferis *et al.*, Comprehensive maps of *Drosophila* higher olfactory centers: spatially segregated fruit  
514 and pheromone representation. *Cell* **128**, 1187-1203 (2007).
- 515 25. S. J. C. Caron, V. Ruta, L. F. Abbott, R. Axel, Random convergence of olfactory inputs in the *Drosophila*  
516 mushroom body. *Nature* **497**, 113-117 (2013).
- 517 26. H. Amin, A. C. Lin, Neuronal mechanisms underlying innate and learned olfactory processing in *Drosophila*.  
518 *Curr Opin Insect Sci* **36**, 9-17 (2019).
- 519 27. M. Flajnik, L. Dupasquier, Evolution of innate and adaptive immunity: can we draw a line? *Trends in*  
520 *Immunology* **25**, 640-644 (2004).
- 521 28. N. Tinbergen, *The study of instinct* (Clarendon Press, Oxford Eng., 1951), pp. 228 p.
- 522 29. K. Korenz, *On Aggression* (Harcourt, Brace & World, Inc., New York, 1963).
- 523 30. B. Ginsburg, W. Allee, Some effects of conditioning on social dominance and subordination in inbred  
524 strains of mice. *Physiological Zoology* **15**, 485-506 (1942).
- 525 31. J. P. Scott, Incomplete Adjustment Caused by Frustration of Untrained Fighting Mice. *Journal of*  
526 *comparative psychology* **39**, 379-390 (1946).
- 527 32. N. N. Kudryavtseva, D. A. Smagin, I. L. Kovalenko, G. B. Vishnivetskaya, Repeated positive fighting  
528 experience in male inbred mice. *Nature protocols* **9**, 2705-2717 (2014).
- 529 33. K. Lagerspetz, Genetic and social causes of aggressive behaviour in mice. *Scandinavian Journal of*  
530 *Psychology* **2**, 167-173 (1961).
- 531 34. N. E. Van de Poll, F. De Jonge, H. G. Van Oyen, J. Van Pelt, Aggressive behaviour in rats: Effects of winning  
532 or losing on subsequent aggressive interactions. *Behav Processes* **7**, 143-155 (1982).
- 533 35. S. Stagkourakis *et al.*, A neural network for intermale aggression to establish social hierarchy. *Nature*  
534 *neuroscience* **21**, 834-842 (2018).
- 535 36. J. B. Rosen, The neurobiology of conditioned and unconditioned fear: a neurobehavioral system analysis  
536 of the amygdala. *Behavioral and cognitive neuroscience reviews* **3**, 23-41 (2004).
- 537 37. C. T. Gross, N. S. Canteras, The many paths to fear. *Nature reviews Neuroscience* **13**, 651-658 (2012).
- 538 38. F. Gore *et al.*, Neural Representations of Unconditioned Stimuli in Basolateral Amygdala Mediate Innate  
539 and Learned Responses. *Cell* **162**, 134-145 (2015).
- 540 39. P. Namburi *et al.*, A circuit mechanism for differentiating positive and negative associations. *Nature* **520**,  
541 675-678 (2015).
- 542 40. A. L. Falkner *et al.*, Hierarchical Representations of Aggression in a Hypothalamic-Midbrain Circuit. *Neuron*  
543 **106**, 637-648 e636 (2020).
- 544 41. J. P. Scott, E. Fredericson, The causes of fighting in mice and rats. *Physiological Zoology* **24**, 273-309 (1951).
- 545 42. K. M. J. Lagerspetz, "Aggression and aggressiveness in laboratory mice" in *Aggressive Behaviour*. (1969),  
546 pp. 77-85.
- 547 43. A. Tellegen, J. M. Horn, Primary aggressive motivation in three inbred strains of mice. *Journal of*  
548 *comparative and physiological psychology* **78**, 297-304 (1972).
- 549 44. S. A. Golden *et al.*, Basal forebrain projections to the lateral habenula modulate aggression reward. *Nature*  
550 **534**, 688-692 (2016).
- 551 45. S. Parmigiani, P. F. Brain, Effects of Residence, Aggressive Experience and Intruder Familiarity on Attack  
552 Shown by Male-Mice. *Behav Process* **8**, 45-57 (1983).
- 553 46. D. Lin *et al.*, Functional identification of an aggression locus in the mouse hypothalamus. *Nature* **470**, 221-  
554 226 (2011).
- 555 47. H. Lee *et al.*, Scalable control of mounting and attack by *Esr1*<sup>+</sup> neurons in the ventromedial hypothalamus.  
556 *Nature* **509**, 627-632 (2014).
- 557 48. H. Alle, P. Jonas, J. R. Geiger, PTP and LTP at a hippocampal mossy fiber-interneuron synapse. *Proceedings*  
558 *of the National Academy of Sciences of the United States of America* **98**, 14708-14713 (2001).



- 559 49. Y. Perez, F. Morin, J. C. Lacaille, A hebbian form of long-term potentiation dependent on mGluR1a in  
560 hippocampal inhibitory interneurons. *Proceedings of the National Academy of Sciences of the United*  
561 *States of America* **98**, 9401-9406 (2001).
- 562 50. L. Lo *et al.*, Connectional architecture of a mouse hypothalamic circuit node controlling social behavior.  
563 *Proceedings of the National Academy of Sciences of the United States of America* **116**, 7503-7512 (2019).
- 564 51. X. Zha *et al.*, VMHvl-Projecting Vglut1+ Neurons in the Posterior Amygdala Gate Territorial Aggression.  
565 *Cell reports* **31** (2020).
- 566 52. C. I. Myme, K. Sugino, G. G. Turrigiano, S. B. Nelson, The NMDA-to-AMPA ratio at synapses onto layer 2/3  
567 pyramidal neurons is conserved across prefrontal and visual cortices. *Journal of neurophysiology* **90**, 771-  
568 779 (2003).
- 569 53. A. M. Thomson, Activity-dependent properties of synaptic transmission at two classes of connections  
570 made by rat neocortical pyramidal axons in vitro. *The Journal of physiology* **502 ( Pt 1)**, 131-147 (1997).
- 571 54. J. A. Kauer, R. C. Malenka, Synaptic plasticity and addiction. *Nature reviews. Neuroscience* **8**, 844-858  
572 (2007).
- 573 55. M. A. Ungless, J. L. Whistler, R. C. Malenka, A. Bonci, Single cocaine exposure in vivo induces long-term  
574 potentiation in dopamine neurons. *Nature* **411**, 583-587 (2001).
- 575 56. D. Saal, Y. Dong, A. Bonci, R. C. Malenka, Drugs of abuse and stress trigger a common synaptic adaptation  
576 in dopamine neurons. *Neuron* **37**, 577-582 (2003).
- 577 57. V. Jeevakumar, S. Kroener, Ketamine Administration During the Second Postnatal Week Alters Synaptic  
578 Properties of Fast-Spiking Interneurons in the Medial Prefrontal Cortex of Adult Mice. *Cerebral cortex* **26**,  
579 1117-1129 (2016).
- 580 58. E. Harde *et al.*, EphrinB2 regulates VEGFR2 during dendritogenesis and hippocampal circuitry  
581 development. *eLife* **8** (2019).
- 582 59. E. McClendon *et al.*, Transient Hypoxemia Disrupts Anatomical and Functional Maturation of Preterm  
583 Fetal Ovine CA1 Pyramidal Neurons. *The Journal of neuroscience : the official journal of the Society for*  
584 *Neuroscience* **39**, 7853-7871 (2019).
- 585 60. J. Ster *et al.*, Calsyntenin-1 regulates targeting of dendritic NMDA receptors and dendritic spine  
586 maturation in CA1 hippocampal pyramidal cells during postnatal development. *The Journal of*  
587 *neuroscience : the official journal of the Society for Neuroscience* **34**, 8716-8727 (2014).
- 588 61. A. S. Ivy *et al.*, Hippocampal dysfunction and cognitive impairments provoked by chronic early-life stress  
589 involve excessive activation of CRH receptors. *The Journal of neuroscience : the official journal of the*  
590 *Society for Neuroscience* **30**, 13005-13015 (2010).
- 591 62. J. W. Wang, D. J. David, J. E. Monckton, F. Battaglia, R. Hen, Chronic fluoxetine stimulates maturation and  
592 synaptic plasticity of adult-born hippocampal granule cells. *The Journal of neuroscience : the official*  
593 *journal of the Society for Neuroscience* **28**, 1374-1384 (2008).
- 594 63. J. Harmer, A. Belbelazi, M. Carr, M. L. Ginger, Airyscan Superresolution Microscopy to Study  
595 Trypanosomatid Cell Biology. *Methods in molecular biology* **2116**, 449-461 (2020).
- 596 64. L. Scipioni, L. Lanzano, A. Diaspro, E. Gratton, Comprehensive correlation analysis for super-resolution  
597 dynamic fingerprinting of cellular compartments using the Zeiss Airyscan detector. *Nature*  
598 *communications* **9**, 5120 (2018).
- 599 65. M. Zhou *et al.*, CCR5 is a suppressor for cortical plasticity and hippocampal learning and memory. *eLife* **5**  
600 (2016).
- 601 66. S. A. Connor *et al.*, Altered Cortical Dynamics and Cognitive Function upon Haploinsufficiency of the  
602 Autism-Linked Excitatory Synaptic Suppressor MDGA2. *Neuron* **91**, 1052-1068 (2016).
- 603 67. A. Gruart, R. Leal-Campanario, J. C. Lopez-Ramos, J. M. Delgado-Garcia, Functional basis of associative  
604 learning and its relationships with long-term potentiation evoked in the involved neural circuits: Lessons  
605 from studies in behaving mammals. *Neurobiology of learning and memory* **124**, 3-18 (2015).

- 606 68. M. N. Quan, Y. T. Tian, K. H. Xu, T. Zhang, Z. Yang, Post weaning social isolation influences spatial cognition,  
607 prefrontal cortical synaptic plasticity and hippocampal potassium ion channels in Wistar rats.  
608 *Neuroscience* **169**, 214-222 (2010).
- 609 69. J. L. Brigman *et al.*, Loss of GluN2B-containing NMDA receptors in CA1 hippocampus and cortex impairs  
610 long-term depression, reduces dendritic spine density, and disrupts learning. *The Journal of neuroscience*  
611 *: the official journal of the Society for Neuroscience* **30**, 4590-4600 (2010).
- 612 70. T. M. Jay *et al.*, Plasticity at hippocampal to prefrontal cortex synapses is impaired by loss of dopamine  
613 and stress: importance for psychiatric diseases. *Neurotoxicity research* **6**, 233-244 (2004).
- 614 71. Y. Qi, Y. Yang, Hunger States Control the Directions of Synaptic Plasticity via Switching Cell Type-Specific  
615 Subunits of NMDA Receptors. *The Journal of neuroscience : the official journal of the Society for*  
616 *Neuroscience* **35**, 13171-13182 (2015).
- 617 72. Y. Rao *et al.*, Repeated in vivo exposure of cocaine induces long-lasting synaptic plasticity in  
618 hypocretin/orexin-producing neurons in the lateral hypothalamus in mice. *The Journal of physiology* **591**,  
619 1951-1966 (2013).
- 620 73. K. M. Crosby, W. Inoue, Q. J. Pittman, J. S. Bains, Endocannabinoids gate state-dependent plasticity of  
621 synaptic inhibition in feeding circuits. *Neuron* **71**, 529-541 (2011).
- 622 74. G. L. Collingridge, S. J. Kehl, H. McLennan, Excitatory amino acids in synaptic transmission in the Schaffer  
623 collateral-commissural pathway of the rat hippocampus. *The Journal of physiology* **334**, 33-46 (1983).
- 624 75. D. Jaffe, D. Johnston, Induction of long-term potentiation at hippocampal mossy-fiber synapses follows a  
625 Hebbian rule. *Journal of neurophysiology* **64**, 948-960 (1990).
- 626 76. P. K. Stanton, T. J. Sejnowski, Associative long-term depression in the hippocampus induced by hebbian  
627 covariance. *Nature* **339**, 215-218 (1989).
- 628 77. N. C. Klapoetke *et al.*, Independent optical excitation of distinct neural populations. *Nature methods* **11**,  
629 338-346 (2014).
- 630 78. S. Frey, J. Bergado-Rosado, T. Seidenbecher, H. C. Pape, J. U. Frey, Reinforcement of early long-term  
631 potentiation (early-LTP) in dentate gyrus by stimulation of the basolateral amygdala: heterosynaptic  
632 induction mechanisms of late-LTP. *The Journal of neuroscience : the official journal of the Society for*  
633 *Neuroscience* **21**, 3697-3703 (2001).
- 634 79. S. Maren, M. S. Fanselow, Synaptic plasticity in the basolateral amygdala induced by hippocampal  
635 formation stimulation in vivo. *The Journal of neuroscience : the official journal of the Society for*  
636 *Neuroscience* **15**, 7548-7564 (1995).
- 637 80. S. Nabavi *et al.*, Engineering a memory with LTD and LTP. *Nature* **511**, 348-352 (2014).
- 638 81. D. Natarajan, H. de Vries, D. J. Saaltink, S. F. de Boer, J. M. Koolhaas, Delineation of violence from  
639 functional aggression in mice: an ethological approach. *Behavior genetics* **39**, 73-90 (2009).
- 640 82. E. J. Hermans, N. F. Ramsey, J. van Honk, Exogenous testosterone enhances responsiveness to social threat  
641 in the neural circuitry of social aggression in humans. *Biological psychiatry* **63**, 263-270 (2008).
- 642 83. C. A. Frye, M. E. Rhodes, A. Walf, J. P. Harney, Testosterone enhances aggression of wild-type mice but  
643 not those deficient in type I 5alpha-reductase. *Brain research* **948**, 165-170 (2002).
- 644 84. C. A. Logan, J. C. Wingfield, Autumnal territorial aggression is independent of plasma testosterone in  
645 mockingbirds. *Hormones and behavior* **24**, 568-581 (1990).
- 646 85. D. J. Albert, D. M. Petrovic, M. L. Walsh, Competitive experience activates testosterone-dependent social  
647 aggression toward unfamiliar males. *Physiology & behavior* **45**, 723-727 (1989).
- 648 86. H. D. Steklis, G. L. Brammer, M. J. Raleigh, M. T. McGuire, Serum testosterone, male dominance, and  
649 aggression in captive groups of vervet monkeys (*Cercopithecus aethiops sabaeus*). *Hormones and*  
650 *behavior* **19**, 154-163 (1985).
- 651 87. D. Olweus, A. Mattsson, D. Schalling, H. Low, Testosterone, aggression, physical, and personality  
652 dimensions in normal adolescent males. *Psychosomatic medicine* **42**, 253-269 (1980).



- 653 88. R. P. Michael, D. Zumpe, Annual cycles of aggression and plasma testosterone in captive male rhesus  
654 monkeys. *Psychoneuroendocrinology* **3**, 217-220 (1978).
- 655 89. C. J. Krebs, Z. T. Halpin, J. N. Smith, Aggression, testosterone, and the spring decline in populations of the  
656 vole *Microtus townsendii*. *Can J Zool* **55**, 430-437 (1977).
- 657 90. H. Persky, K. D. Smith, G. K. Basu, Relation of psychologic measures of aggression and hostility to  
658 testosterone production in man. *Psychosomatic medicine* **33**, 265-277 (1971).
- 659 91. D. J. Albert, R. H. Jonik, M. L. Walsh, D. M. Petrovic, Testosterone supports hormone-dependent  
660 aggression in female rats. *Physiology & behavior* **46**, 185-189 (1989).
- 661 92. R. E. Whalen, F. Johnson, Aggression in adult female mice: chronic testosterone treatment induces attack  
662 against olfactory bulbectomized male and lactating female mice. *Physiology & behavior* **43**, 17-20 (1988).
- 663 93. M. A. Mann, B. Svare, Prenatal testosterone exposure elevates maternal aggression in mice. *Physiology &*  
664 *behavior* **30**, 503-507 (1983).
- 665 94. M. S. Barkley, B. D. Goldman, The effects of castration and Silastic implants of testosterone on intermale  
666 aggression in the mouse. *Hormones and behavior* **9**, 32-48 (1977).
- 667 95. M. S. Barkley, B. D. Goldman, Testosterone-induced aggression in adult female mice. *Hormones and*  
668 *behavior* **9**, 76-84 (1977).
- 669 96. D. A. Powell, J. Francis, N. Schneiderman, The effects of castration, neonatal injections of testosterone,  
670 and previous experience with fighting on shock-elicited aggression. *Communications in behavioral biology.*  
671 *Part A: [Original articles]* **5**, 371-377 (1971).
- 672 97. J. Archer, Testosterone and human aggression: an evaluation of the challenge hypothesis. *Neuroscience*  
673 *and biobehavioral reviews* **30**, 319-345 (2006).
- 674 98. J. R. Moffitt *et al.*, Molecular, spatial, and functional single-cell profiling of the hypothalamic preoptic  
675 region. *Science* **362** (2018).
- 676 99. K. K. Ishii *et al.*, A Labeled-Line Neural Circuit for Pheromone-Mediated Sexual Behaviors in Mice. *Neuron*  
677 **95**, 123-137 e128 (2017).
- 678 100. G. Cheron, J. Marquez-Ruiz, T. Kishino, B. Dan, Disruption of the LTD dialogue between the cerebellum  
679 and the cortex in Angelman syndrome model: a timing hypothesis. *Frontiers in systems neuroscience* **8**,  
680 221 (2014).
- 681 101. C. Hansel, D. J. Linden, E. D'Angelo, Beyond parallel fiber LTD: the diversity of synaptic and non-synaptic  
682 plasticity in the cerebellum. *Nature neuroscience* **4**, 467-475 (2001).
- 683 102. R. Llinas, E. J. Lang, J. P. Welsh, The cerebellum, LTD, and memory: alternative views. *Learning & memory*  
684 **3**, 445-455 (1997).
- 685 103. B. Pradier *et al.*, Persistent but Labile Synaptic Plasticity at Excitatory Synapses. *The Journal of*  
686 *neuroscience : the official journal of the Society for Neuroscience* **38**, 5750-5758 (2018).
- 687 104. K. Koga *et al.*, Impaired presynaptic long-term potentiation in the anterior cingulate cortex of Fmr1 knock-  
688 out mice. *The Journal of neuroscience : the official journal of the Society for Neuroscience* **35**, 2033-2043  
689 (2015).
- 690 105. C. A. Barnes *et al.*, LTP saturation and spatial learning disruption: effects of task variables and saturation  
691 levels. *The Journal of neuroscience : the official journal of the Society for Neuroscience* **14**, 5793-5806  
692 (1994).
- 693 106. B. W. Schroeder, P. Shinnick-Gallagher, Fear learning induces persistent facilitation of amygdala synaptic  
694 transmission. *The European journal of neuroscience* **22**, 1775-1783 (2005).
- 695 107. K. Keleman *et al.* (2012) Dopamine neurons modulate pheromone responses in *Drosophila* courtship  
696 learning. in *Nature* (Nature Publishing Group), pp 145-149.
- 697 108. X. Zhao, D. Lenek, U. Dag, B. J. Dickson, K. Keleman (2018) Persistent activity in a recurrent circuit underlies  
698 courtship memory in *Drosophila*. in *Elife* (eLife Sciences Publications Limited).
- 699 109. L. C. Griffith, A. Ejima, Courtship learning in *Drosophila melanogaster*: diverse plasticity of a reproductive  
700 behavior. *Learn Mem* **16**, 743-750 (2009).

- 701 110. L. L. Lanier, Shades of grey — the blurring view of innate and adaptive immunity. *Nat. Rev. Immunol.* **13**,  
702 73-74 (2013).
- 703 111. G. F. Sonnenberg, M. R. Hepworth, Functional interactions between innate lymphoid cells and adaptive  
704 immunity. *Nat. Rev. Immunol.* **19**, 599-613 (2019).
- 705 112. M. P. Donley, J. B. Rosen, Novelty and fear conditioning induced gene expression in high and low states of  
706 anxiety. *Learning & memory* **24**, 449-461 (2017).
- 707 113. R. C. Twining, J. E. Vantrease, S. Love, M. Padival, J. A. Rosenkranz, An intra-amygdala circuit specifically  
708 regulates social fear learning. *Nature neuroscience* **20**, 459-469 (2017).
- 709 114. C. T. Gross, N. S. Canteras, The many paths to fear. *Nature reviews. Neuroscience* **13**, 651-658 (2012).
- 710 115. E. W. Fish, J. F. De Bold, K. A. Miczek, Aggressive behavior as a reinforcer in mice: activation by  
711 allopregnanolone. *Psychopharmacology* **163**, 459-466 (2002).
- 712 116. A. L. Falkner, L. Grosenick, T. J. Davidson, K. Deisseroth, D. Lin, Hypothalamic control of male aggression-  
713 seeking behavior. *Nature neuroscience* **19**, 596-604 (2016).
- 714 117. S. A. Golden *et al.*, Nucleus Accumbens Drd1-Expressing Neurons Control Aggression Self-Administration  
715 and Aggression Seeking in Mice. *The Journal of neuroscience : the official journal of the Society for*  
716 *Neuroscience* **39**, 2482-2496 (2019).
- 717 118. K. L. Gobrogge, Y. Liu, X. Jia, Z. Wang, Anterior hypothalamic neural activation and neurochemical  
718 associations with aggression in pair-bonded male prairie voles. *THE JOURNAL OF COMPARATIVE*  
719 *NEUROLOGY* **502**, 1109-1122 (2007).
- 720 119. R. Remedios *et al.*, Social behaviour shapes hypothalamic neural ensemble representations of conspecific  
721 sex. *Nature* **550**, 388-392 (2017).
- 722 120. Y. Li *et al.*, Neuronal Representation of Social Information in the Medial Amygdala of Awake Behaving  
723 Mice. *Cell* **171**, 1176-1190 e1117 (2017).
- 724 121. M. Zelikowsky *et al.*, The Neuropeptide Tac2 Controls a Distributed Brain State Induced by Chronic Social  
725 Isolation Stress. *Cell* **173**, 1265-1279 e1219 (2018).
- 726 122. D. W. Kim *et al.*, Multimodal Analysis of Cell Types in a Hypothalamic Node Controlling Social Behavior.  
727 *Cell* **179**, 713-728 e717 (2019).
- 728 123. K. K. Soma, Testosterone and aggression: Berthold, birds and beyond. *Journal of neuroendocrinology* **18**,  
729 543-551 (2006).
- 730 124. J. M. Hume, K. E. Wynne-Edwards, Castration reduces male testosterone, estradiol, and territorial  
731 aggression, but not paternal behavior in biparental dwarf hamsters (*Phodopus campbelli*). *Hormones and*  
732 *behavior* **48**, 303-310 (2005).
- 733 125. D. J. Albert, R. H. Jonik, N. V. Watson, B. B. Gorzalka, M. L. Walsh, Hormone-dependent aggression in male  
734 rats is proportional to serum testosterone concentration but sexual behavior is not. *Physiology & behavior*  
735 **48**, 409-416 (1990).
- 736 126. D. J. Albert, E. M. Dyson, M. L. Walsh, Intermale social aggression: reinstatement in castrated rats by  
737 implants of testosterone propionate in the medial hypothalamus. *Physiology & behavior* **39**, 555-560  
738 (1987).
- 739 127. J. Nordman *et al.*, Potentiation of divergent medial amygdala pathways drives experience-dependent  
740 aggression escalation. *The Journal of neuroscience : the official journal of the Society for Neuroscience*  
741 10.1523/JNEUROSCI.0370-20.2020 (2020).
- 742 128. S. Inoue *et al.*, Periodic Remodeling in a Neural Circuit Governs Timing of Female Sexual Behavior. *Cell*  
743 **179**, 1393-+ (2019).
- 744 129. G. D'Agostino *et al.*, Prolyl endopeptidase-deficient mice have reduced synaptic spine density in the CA1  
745 region of the hippocampus, impaired LTP, and spatial learning and memory. *Cerebral cortex* **23**, 2007-  
746 2014 (2013).
- 747 130. H. Eichenbaum, Spatial learning. The LTP-memory connection. *Nature* **378**, 131-132 (1995).

- 748 131. K. Sakimura *et al.*, Reduced hippocampal LTP and spatial learning in mice lacking NMDA receptor epsilon  
749 1 subunit. *Nature* **373**, 151-155 (1995).
- 750 132. S. Davis, S. P. Butcher, R. G. Morris, The NMDA receptor antagonist D-2-amino-5-phosphonopentanoate  
751 (D-AP5) impairs spatial learning and LTP in vivo at intracerebral concentrations comparable to those that  
752 block LTP in vitro. *The Journal of neuroscience : the official journal of the Society for Neuroscience* **12**, 21-  
753 34 (1992).
- 754 133. J. T. Kwon, J. S. Choi, Cornering the fear engram: long-term synaptic changes in the lateral nucleus of the  
755 amygdala after fear conditioning. *The Journal of neuroscience : the official journal of the Society for*  
756 *Neuroscience* **29**, 9700-9703 (2009).
- 757 134. H. C. Bergstrom, The neurocircuitry of remote cued fear memory. *Neuroscience and biobehavioral reviews*  
758 **71**, 409-417 (2016).
- 759 135. A. M. Apergis-Schoute, J. Debiec, V. Doyere, J. E. LeDoux, G. E. Schafe, Auditory fear conditioning and long-  
760 term potentiation in the lateral amygdala require ERK/MAP kinase signaling in the auditory thalamus: a  
761 role for presynaptic plasticity in the fear system. *The Journal of neuroscience : the official journal of the*  
762 *Society for Neuroscience* **25**, 5730-5739 (2005).
- 763 136. X. B. Li, T. Inoue, S. Nakagawa, T. Koyama, Effect of mediodorsal thalamic nucleus lesion on contextual  
764 fear conditioning in rats. *Brain research* **1008**, 261-272 (2004).
- 765 137. L. Petreanu, T. Mao, S. M. Sternson, K. Svoboda, The subcellular organization of neocortical excitatory  
766 connections. *Nature* **457**, 1142-1145 (2009).
- 767 138. J. Lu *et al.*, MIN1PIPE: A Miniscope 1-Photon-Based Calcium Imaging Signal Extraction Pipeline. *Cell reports*  
768 **23**, 3673-3684 (2018).
- 769 139. J. I. Sanders, A. Kepecs, A low-cost programmable pulse generator for physiology and behavior. *Frontiers*  
770 *in neuroengineering* **7**, 43 (2014).
- 771 140. J. H. Siegle *et al.*, Open Ephys: an open-source, plugin-based platform for multichannel electrophysiology.  
772 *J Neural Eng* **14**, 045003 (2017).
- 773 141. K. B. J. Franklin, G. Paxinos, *THE MOUSE BRAIN IN STEREOTACTIC COORDINATES* (2008), vol. Third edition.
- 774 142. G. Lee, K. A. Goosens, Sampling Blood from the Lateral Tail Vein of the Rat. *Jove-J Vis Exp* ARTN e52766  
775 10.3791/52766 (2015).
- 776 143. C. W. Chua *et al.*, Differential requirements of androgen receptor in luminal progenitors during prostate  
777 regeneration and tumor initiation. *eLife* **7** (2018).
- 778 144. Q. Xie *et al.*, Dissecting cell-type-specific roles of androgen receptor in prostate homeostasis and  
779 regeneration through lineage tracing. *Nature communications* **8**, 14284 (2017).
- 780 145. R. E. Sorge *et al.*, Different immune cells mediate mechanical pain hypersensitivity in male and female  
781 mice. *Nature neuroscience* **18**, 1081-1083 (2015).

782

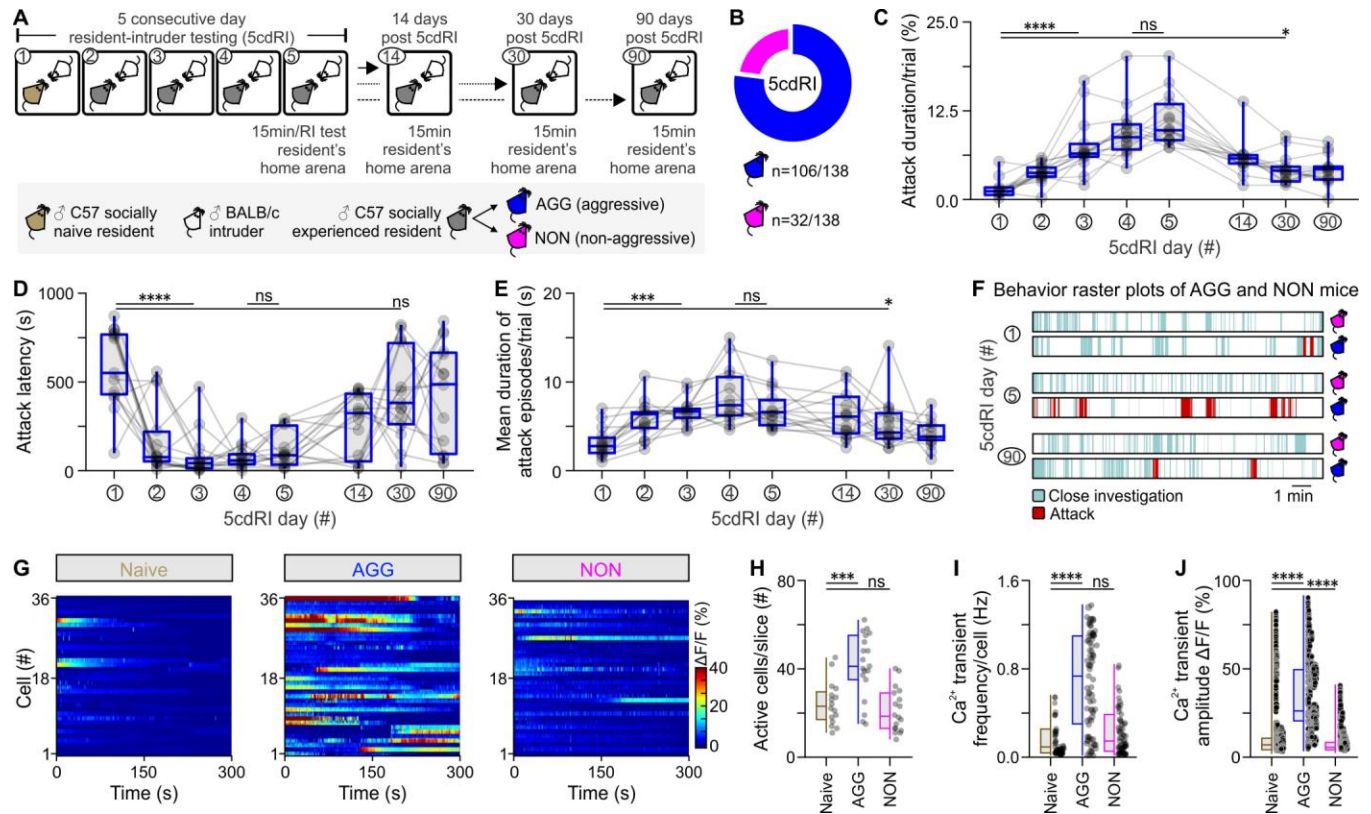

783

784 **Fig. 1. Aggression learning alters baseline activity dynamics in VMHvl<sup>Esr1</sup> neurons.**

785 (A) Schematic of the experimental design - five consecutive day resident-intruder test (5cdRI), with three  
 786 follow-up dates, used for the study of the behavioral effect of aggression training.

787 (B) Summary indicative of the number of male animals exhibiting the two distinct aggression phenotypes  
 788 (n=138).

789 (C) Quantification of the cumulative duration (in %) of aggression per trial (n=15 AGG mice per group,  
 790 Kruskal-Wallis one-way ANOVA with uncorrected Dunn's post hoc test,  $P < 0.0001$  between day 1 and  
 791 day 3 of the 5cdRI,  $P = 0.4819$  between day 4 and day 5 of the 5cdRI,  $P = 0.0149$  between day 1 and  
 792 day 30).

793 (D) Quantification of attack latency (in seconds) of aggression per trial (n=15 AGG mice per group,  
 794 Kruskal-Wallis one-way ANOVA with uncorrected Dunn's post hoc test,  $P < 0.0001$  between day 1 and

795 day 3 of the 5cdRI,  $P = 0.5602$  between day 4 and day 5 of the 5cdRI,  $P = 0.2184$  between day 1 and  
796 day 30).

797 (E) Quantification of average attack episode duration (in seconds) per trial ( $n=15$  AGG mice per group,  
798 Kruskal-Wallis one-way ANOVA with uncorrected Dunn's post hoc test,  $P < 0.0001$  between day 1 and  
799 day 3 of the 5cdRI,  $P = 0.3326$  between day 4 and day 5 of the 5cdRI,  $P = 0.0209$  between day 1 and  
800 day 30).

801 (F) Behavior raster plots from AGG and NON mice, at different days of the 5cdRI test.

802 (G) Baseline  $\text{Ca}^{2+}$  activity of VMHvl<sup>Esr1</sup> neurons recorded *ex vivo*, in brain slices of socially naive,  
803 aggressive (AGG), and non-aggressive (NON) males.

804 (H) Quantification of active cells/slice ( $n=16-19$  brain slices, collected from  $n=7-9$  mice, one-way ANOVA  
805 with Dunnett's post hoc test,  $P = 0.0002$  between socially naive and AGG mouse brain slices,  $P = 0.6358$   
806 between socially naive and NON mouse brain slices).

807 (I) Quantification of  $\text{Ca}^{2+}$  spike frequency per cell ( $n=16-19$  brain slices, collected from  $n=7-9$  mice,  
808 Kruskal-Wallis one-way ANOVA with Dunn's post hoc test,  $P < 0.0001$  between socially naive and AGG  
809 mice,  $P = 0.3331$  between socially naive and NON mice).

810 (J) Quantification of  $\text{Ca}^{2+}$  spike amplitude ( $n=16-19$  brain slices, collected from  $n=7-9$  mice, Kruskal-Wallis  
811 one-way ANOVA with Dunn's post hoc test,  $P < 0.0001$  between socially naive and AGG mice,  $P < 0.0001$   
812 between socially naive and NON mice).

813 ns; not significant,  $*P < 0.05$ ,  $***P < 0.001$ ,  $****P < 0.0001$ . In box-and-whisker plots, center lines indicate  
814 medians, box edges represent the interquartile range, and whiskers extend to the minimal and maximal  
815 values.



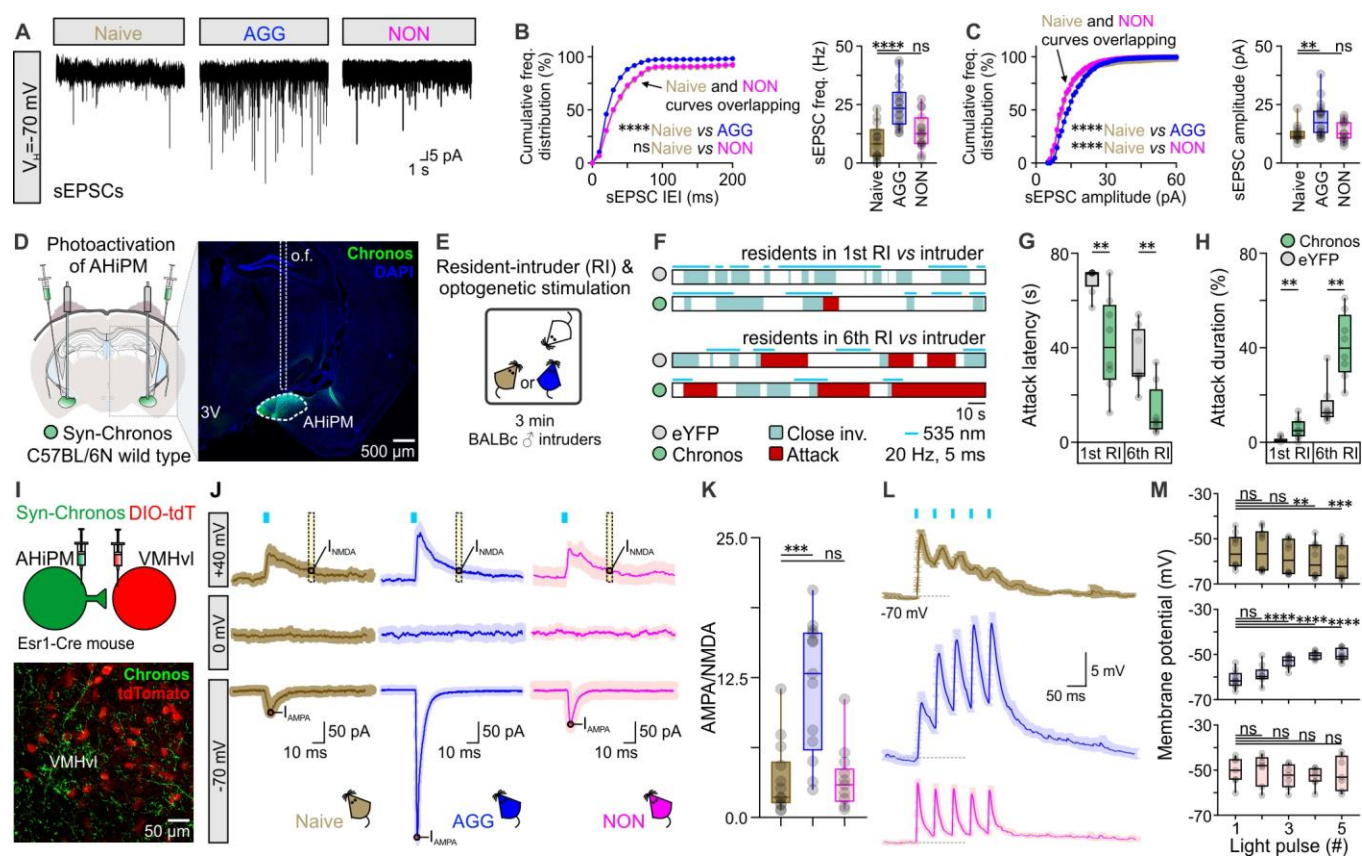

816

817 **Fig. 2. AHIPM $\rightarrow$ VMHvl<sup>Esr1</sup> synapses become potentiated following aggression training.**

818 (A) Representative recordings of spontaneous excitatory post-synaptic currents (sEPSCs) from VMHvl<sup>Esr1</sup>  
819 neurons, from socially naive, AGG and NON mice.

820 (B) Left – cumulative frequency distribution plot of sEPSC IELI in voltage-clamp recordings collected from  
821 VMHvl<sup>Esr1</sup> neurons from socially naive, AGG and NON mice (n=14-18 VMHvl<sup>Esr1</sup> neuron recording per  
822 group, collected from 8-10 mice per group, Kolmogorov-Smirnov test,  $P < 0.0001$  between socially naive  
823 and AGG mice,  $P = 0.3454$  between socially naive and NON mice). Right – comparison of sEPSC  
824 frequency from voltage-clamp recordings collected from VMHvl<sup>Esr1</sup> neurons from socially naive, AGG and  
825 NON mice (n=14-18 VMHvl<sup>Esr1</sup> neuron recording per group, collected from 8-10 mice per group, one-way  
826 ANOVA with Dunnett's post hoc test,  $P < 0.0001$  between socially naive and AGG mouse brain slices,  $P$   
827 = 0.2576 between socially naive and NON mouse brain slices).

828 (C) Left – cumulative frequency distribution plot of sEPSC amplitude in voltage-clamp recordings  
829 collected from VMHvl<sup>Esr1</sup> neurons from socially naive, AGG and NON mice (n=14-18 VMHvl<sup>Esr1</sup> neuron  
830 recording per group, collected from 8-10 mice per group, Kolmogorov-Smirnov test,  $P < 0.0001$  between  
831 socially naive and AGG mice,  $P < 0.0001$  between socially naive and NON mice). Right – comparison of  
832 sEPSC frequency from voltage-clamp recordings collected from VMHvl<sup>Esr1</sup> neurons from socially naive,  
833 AGG and NON mice (n=14-18 VMHvl<sup>Esr1</sup> neuron recording per group, collected from 8-10 mice per group,  
834 Kruskal-Wallis one-way ANOVA with uncorrected Dunn's post hoc test,  $P = 0.0041$  between socially  
835 naive and AGG mouse brain slices,  $P = 0.6712$  between socially naive and NON mouse brain slices).

836 (D) Left – schematic of the experimental design used for optogenetic studies of aggression following  
837 photoactivation of AHiPM, and right – confocal image indicative of Chronos-eYFP expression in AHiPM.

838 (E) Schematic illustration of the experimental protocol used in AHiPM<sup>Chronos</sup> stimulation experiments.

839 (F) Sample behavior raster plots with *in vivo* optogenetics and social behavior in the resident intruder (RI)  
840 assay, of socially naive and AGG mice.

841 (G) Quantification of attack latency, in the first and sixth RI trial (n=8 mice per group, first RI, two-sided  
842 Mann–Whitney U test,  $P = 0.0033$  between YFP and Chronos groups, sixth RI, two-tailed unpaired *t*-test,  
843  $P = 0.0022$  between YFP and Chronos groups).

844 (H) Quantification of attack duration, in the first and sixth RI trial (n=8 mice per group, first RI, two-sided  
845 Mann–Whitney U test,  $P = 0.0079$  between YFP and Chronos groups, sixth RI,  $P = 0.0011$  between YFP  
846 and Chronos groups).

847 (I) Top – schematic of the experimental design used for the study of the AHiPM–VMHvl synapse and  
848 bottom – confocal image indicative of AHiPM originating processes in VMHvl.

849 (J) Identification of the AHIPM→VMHvl synapse as purely excitatory, and extraction of the AMPA to  
850 NMDA ratio in socially naive, AGG and NON mice (average of n=13-14 neuron recordings from 8-9  
851 socially naive, AGG and NON mice respectively).

852 (K) Quantification of the AMPA/NMDA ratio (n=13-14, Kruskal-Wallis one-way ANOVA with Dunn's post  
853 hoc test,  $P = 0.0005$  between socially naive and AGG mice,  $P > 0.9999$  between socially naive and NON  
854 mice).

855 (L) Synaptic integration in VMHvl<sup>Esr1</sup> neurons from socially naive, AGG and NON mice (average traces  
856 of n=7-10 neuron recordings from 7-9 mice respectively).

857 (M) Quantification of the five optically-evoked excitatory post-synaptic potentials (oEPSP) peak amplitude  
858 presented in (O). Top - oEPSP amplitude quantification in VMHvl<sup>Esr1</sup> neurons recorded from socially naive  
859 mice (n=10 neurons from 9 mice, Friedman one-way ANOVA with Dunn's post hoc test,  $P > 0.9999$   
860 between 1<sup>st</sup> and 2<sup>nd</sup> pulse,  $P = 0.3587$  between 1<sup>st</sup> and 3<sup>rd</sup> pulse,  $P = 0.0028$  between 1<sup>st</sup> and 4<sup>th</sup> pulse,  
861 and  $P = 0.0009$  between 1<sup>st</sup> and 5<sup>th</sup> pulse). Middle - oEPSP amplitude quantification in VMHvl<sup>Esr1</sup> neurons  
862 recorded from AGG mice (n=10 neurons from 9 mice, one-way ANOVA with Dunnett's post hoc test,  $P =$   
863  $0.2935$  between 1<sup>st</sup> and 2<sup>nd</sup> pulse,  $P < 0.0001$  between 1<sup>st</sup> and 3<sup>rd</sup> pulse,  $P < 0.0001$  between 1<sup>st</sup> and 4<sup>th</sup>  
864 pulse, and  $P < 0.0001$  between 1<sup>st</sup> and 5<sup>th</sup> pulse). Bottom - oEPSP amplitude quantification in VMHvl<sup>Esr1</sup>  
865 neurons recorded from NON mice (n=7 neurons from 7 mice, one-way ANOVA with Dunnett's post hoc  
866 test,  $P = 0.9865$  between 1<sup>st</sup> and 2<sup>nd</sup> pulse,  $P = 0.5704$  between 1<sup>st</sup> and 3<sup>rd</sup> pulse,  $P = 0.0751$  between 1<sup>st</sup>  
867 and 4<sup>th</sup> pulse, and  $P = 0.9803$  between 1<sup>st</sup> and 5<sup>th</sup> pulse).

868 ns; not significant, \*\* $P < 0.01$ , \*\*\* $P < 0.001$ , \*\*\*\* $P < 0.0001$ . In box-and-whisker plots, center lines indicate  
869 medians, box edges represent the interquartile range, and whiskers extend to the minimal and maximal  
870 values.



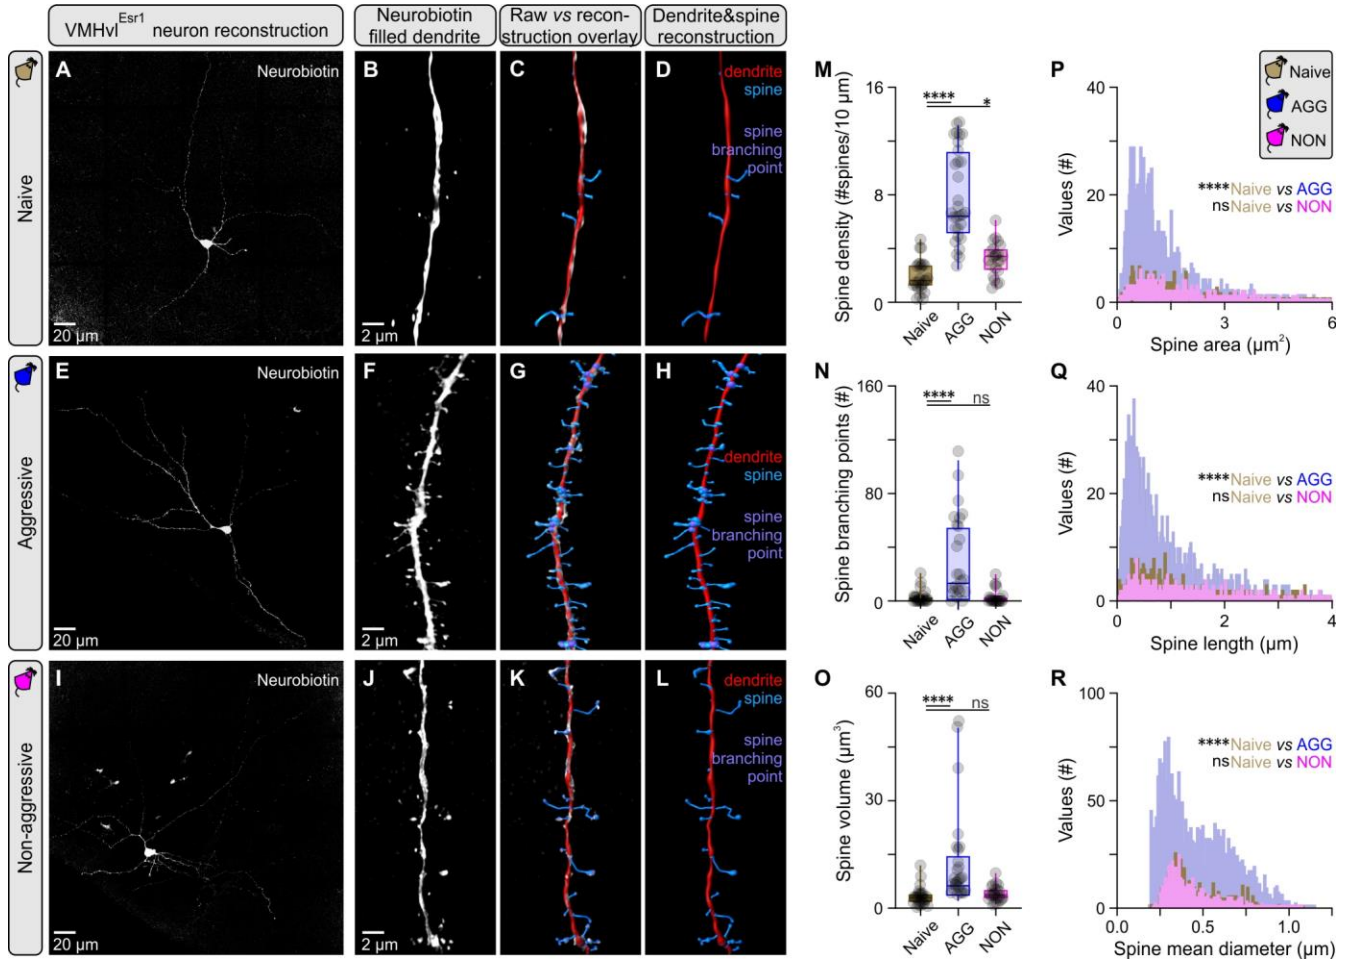

871

872 **Fig. 3. Increased dendritic spine complexity in VMHv1<sup>Esr1</sup> neurons following aggression training.**

873 (A) Maximum projection confocal image of a VMHv1<sup>Esr1</sup> neuron from a socially naive mouse recorded *ex*  
 874 *vivo*, and filled with Neurobiotin.

875 (B) 3D rendering of a second order dendritic segment Airyscan image from the neuron presented in (A).

876 (C) Overlay of reconstruction data generated in Imaris against 3D rendering for the dendritic segment  
 877 presented in (B).

878 (D) Reconstructed dendritic segment of a VMHv1<sup>Esr1</sup> neuron from a socially naive mouse, with color coding  
 879 for the dendrite and spines.

- 880 (E) Maximum projection confocal image of a VMHvI<sup>Esr1</sup> neuron from an aggressive (AGG) mouse  
881 recorded *ex vivo*, and filled with Neurobiotin.
- 882 (F) 3D rendering of a second order dendritic segment Airyscan image from the neuron presented in (E).
- 883 (G) Overlay of reconstruction data generated in Imaris against 3D rendering for the dendritic segment  
884 presented in (F).
- 885 (H) Reconstructed dendritic segment of a VMHvI<sup>Esr1</sup> neuron from an AGG mouse, with color coding for  
886 the dendrite and spines.
- 887 (I) Maximum projection confocal image of a VMHvI<sup>Esr1</sup> neuron from a non-aggressive (NON) mouse  
888 recorded *ex vivo*, and filled with Neurobiotin.
- 889 (J) 3D rendering of a second order dendritic segment Airyscan image from the neuron presented in (I).
- 890 (K) Overlay of reconstruction data generated in Imaris against 3D rendering for the dendritic segment  
891 presented in (J).
- 892 (L) Reconstructed dendritic segment of a VMHvI<sup>Esr1</sup> neuron from a NON mouse, with color coding for the  
893 dendrite and spines.
- 894 (M) Quantification of spine density in second order dendrites of VMHvI<sup>Esr1</sup> neurons from socially naive,  
895 AGG and NON mice (n=3-5 cells per group, n=1 cell/brain slice/animal, n=23-26 segments analyzed per  
896 group, Kruskal-Wallis one-way ANOVA with Dunn's post hoc test,  $P < 0.0001$  between socially naive and  
897 AGG mice,  $P = 0.0432$  between socially naive and NON mice).
- 898 (N) Quantification of branching points in second order dendrites of VMHvI<sup>Esr1</sup> neurons from socially naive,  
899 AGG and NON mice (n=23-26 segments analyzed per group, Kruskal-Wallis one-way ANOVA with  
900 Dunn's post hoc test,  $P < 0.0001$  between socially naive and AGG mice,  $P = 0.9969$  between socially  
901 naive and NON mice).

902 (O) Quantification of spine volume in second order dendrites of VMHvl<sup>Esr1</sup> neurons from socially naive,  
903 AGG and NON mice (n=23-26 segments analyzed per group, Kruskal-Wallis one-way ANOVA with  
904 Dunn's post hoc test,  $P < 0.0001$  between socially naive and AGG mice,  $P = 0.4640$  between socially  
905 naive and NON mice).

906 (P) Frequency distribution plot of spine area, of spines present in second order dendrites in VMHvl<sup>Esr1</sup>  
907 neurons from socially naive, AGG and NON mice (n=3-5 cells per group, n = 1 cell/brain slice/animal,  
908 n=402-2365 spines per group).

909 (Q) Frequency distribution plot of spine length, of spines present in second order dendrites in VMHvl<sup>Esr1</sup>  
910 neurons from socially naive, AGG and NON mice (n=402-2365 spines per group).

911 (R) Frequency distribution plot of spine mean diameter, of spines present in second order dendrites in  
912 VMHvl<sup>Esr1</sup> neurons from socially naive, AGG and NON mice (n=402-2365 spines per group).

913 ns; not significant,  $*P < 0.05$ ,  $****P < 0.0001$ . In box-and-whisker plots, center lines indicate medians, box  
914 edges represent the interquartile range, and whiskers extend to the minimal and maximal values.

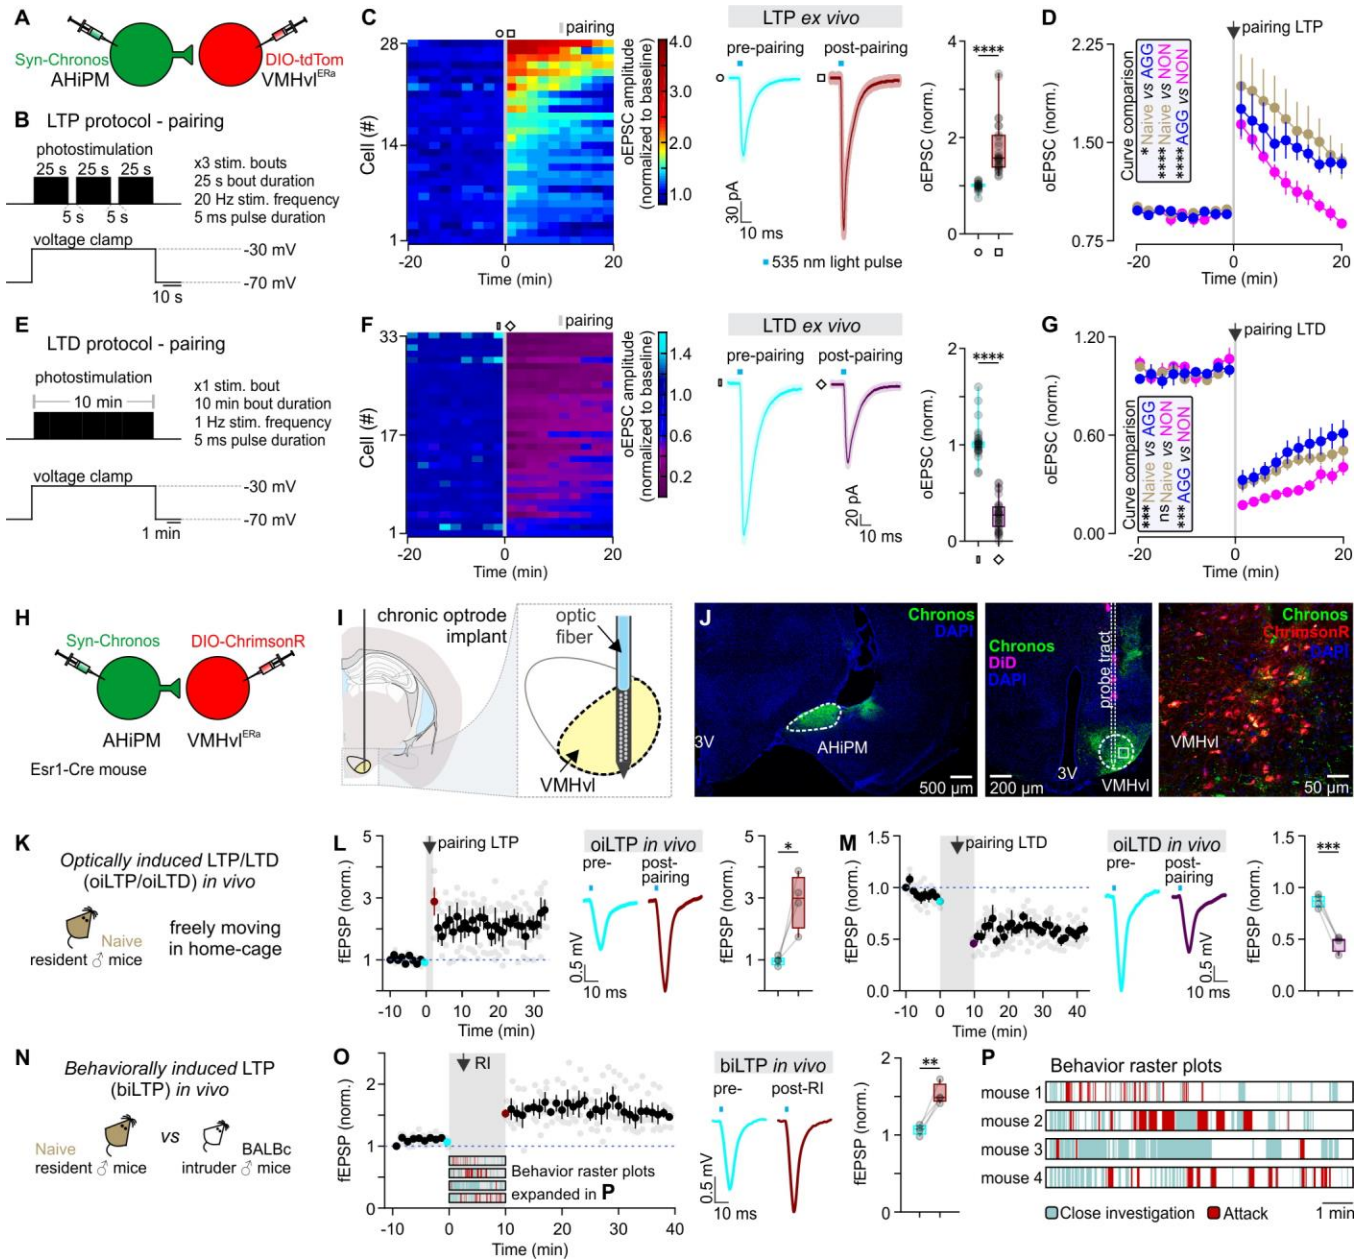

915

916 **Fig. 4. Induction of LTP and LTD at AHiPM $\rightarrow$ VMHv1<sup>Esr1</sup> synapses *ex vivo* and *in vivo*.**

917 (A) Schematic of the experimental design used to study the induction of LTP and LTD *ex vivo* in socially  
918 naive, aggressive (AGG) and non-aggressive (NON) mice.

919 (B) Illustration of the experimental protocol used to induce LTP in the AHiPM $\rightarrow$ VMHv1 synapse.

920 (C) Left – heat map illustrating the magnitude of LTP induction in all recorded VMHvl<sup>Esr1</sup> neurons. Middle  
921 – average current immediately prior to and following the induction of LTP (middle, n=28 neurons collected  
922 from the three groups – socially naive, AGG and NON, with n=6-8 mice per group, light color envelope is  
923 the standard error). Right – quantification of the optically evoked excitatory post-synaptic current  
924 (oEPSC), prior to and following the induction of LTP (pre- vs post-pairing, n=28 neurons collected from  
925 the three groups – socially naive, AGG and NON, with n=6-8 mice per group, two-tailed Wilcoxon signed-  
926 rank test,  $P < 0.0001$ ).

927 (D) Identification of differences in amplitude and persistence of LTP in socially naive, AGG, and NON  
928 mice (n=9 neurons for 6 socially naive mice, n=10 neurons from 8 AGGs, and n=9 neurons from 6 NONs,  
929 Kolmogorov-Smirnov test for curve comparison,  $P = 0.0183$  between socially naive and AGG mice,  $P <$   
930  $0.0001$  between socially naive and NON mice, and  $P < 0.0001$  between AGG and NON mice).

931 (E) Illustration of the experimental protocol used to induce LTD in the AHiPM→VMHvl synapse.

932 (F) Left – heat map illustrating the magnitude of LTD induction in all recorded VMHvl<sup>Esr1</sup> neurons. Middle  
933 – average current immediately prior to and following the induction of LTD (middle, n=33 neurons collected  
934 from the three groups – socially naive, AGG and NON, with n=8 mice per group, light color envelope is  
935 the standard error). Right – quantification of the oEPSC, prior to and following the induction of LTD (pre-  
936 vs post-pairing, n=33 neurons collected from the three groups – socially naive, AGG and NON, with n=8  
937 mice per group, two-tailed Wilcoxon signed-rank test,  $P < 0.0001$ ).

938 (G) LTD dynamics in the three groups (n=12 neurons for 8 socially naive mice, n=10 neurons from 8  
939 AGGs, and n=11 neurons from 8 NONs, Kolmogorov-Smirnov test for curve comparison,  $P = 0.0002$   
940 between socially naive and AGG mice,  $P > 0.9999$  between socially naive and NON mice, and  $P = 0.0008$   
941 between AGG and NON mice).

942 (H) Schematic of the experimental design used to study the induction of LTP and LTD *in vivo* in socially  
943 naive mice.

944 (I) Schematic illustration of the target coordinates of the optrode used to record local field potentials in  
945 VMHvl.

946 (J) Left – representative confocal image of Chronos-eYFP expression in AHiPM. Middle - representative  
947 confocal image of the silicon probe tract targeted to VMHvl. Right – high magnification confocal image of  
948 VMHvl.

949 (K) Illustration of the experimental design used to induce LTP or LTD in the AHiPM→VMHvl synapse *in*  
950 *vivo*.

951 (L) Left – plot of average of four experiments from four mice of field EPSP slope (normalized to baseline  
952 period) before and after optically-induced LTP (oiLTP). Middle – *in vivo* average field response prior to  
953 and following the induction of LTP. Right – quantification of optically induced field EPSPs (fEPSP), prior  
954 to and following the induction of LTP (pre- vs post-pairing, n=4 mice per group, two-tailed paired *t*-test, *P*  
955 = 0.0283).

956 (M) Left – plot of average of four experiments from four mice of field EPSP slope (normalized to baseline  
957 period) before and after optically-induced LTD (oiLTD). Middle – *in vivo* average field response prior to  
958 and following the induction of LTD. Right – quantification of optically induced field EPSPs (fEPSP), prior  
959 to and following the induction of LTD (pre- vs post-pairing, n=4 mice per group, two-tailed paired *t*-test,  
960 *P* = 0.0007).

961 (N) Illustration of the experimental design used to test the behavioral induction of LTP.

962 (O) Left – plot of average of four experiments from four mice of field EPSP slope (normalized to baseline  
963 period) before and after behaviorally-induced LTP (biLTP). Middle – *in vivo* average field response prior  
964 to and following the behavioral induction of LTP. Right – quantification of optically induced field EPSPs  
965 (fEPSP), prior to and following social behavior experience in a socially naive mouse (pre- vs post-pairing,  
966 n=4 mice per group, two-tailed paired *t*-test, *P* = 0.0071).



967 (P) Illustration of the behaviors expressed in the resident-intruder assay from socially naive mice used  
968 for the *in vivo* study of hypothalamic LTP.

969 ns; not significant, \* $P < 0.05$ , \*\* $P < 0.01$ , \*\*\* $P < 0.001$ , \*\*\*\* $P < 0.0001$ . In box-and-whisker plots, center  
970 lines indicate medians, box edges represent the interquartile range, and whiskers extend to the minimal  
971 and maximal values.

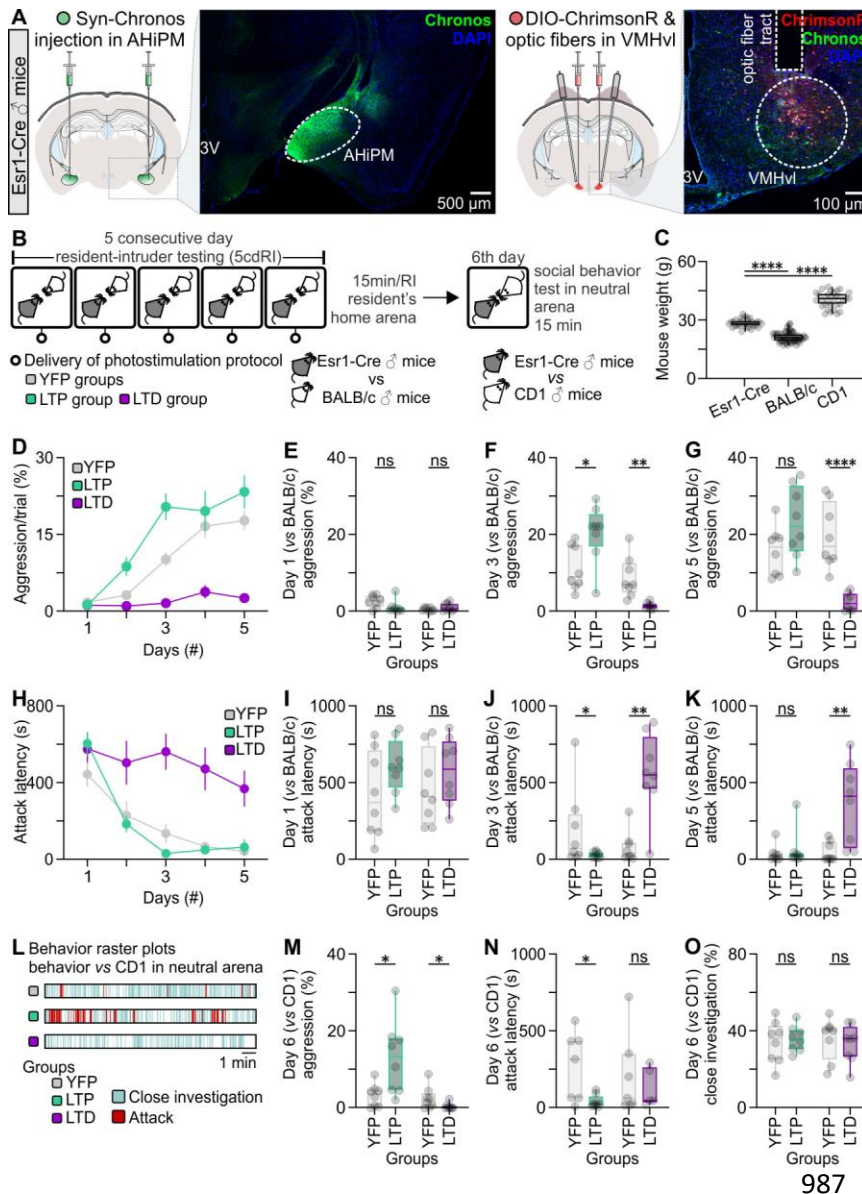

988 **Fig. 5. Optogenetic induction of LTP or LTD at AHIPM→VMHv1<sup>Esr1</sup> synapses *in vivo* facilitates or**  
 989 **abolishes, respectively, the effect of aggression training.**

990 (A) Left- representative confocal image and schematic indicative of ChrimsonR expression in VMHv1<sup>Esr1</sup>  
 991 neurons, eYFP terminals of the AHIPM→VMHv1 projection, and the optic fiber tract terminating above  
 992 VMHv1. Right - representative confocal image and schematic indicative of Chronos-eYFP expression in  
 993 AHIPM.



- 994 (B) Schematic of the experimental design used to identify whether LTP and LTD have an impact on  
995 aggression training.
- 996 (C) Weight measurements of the mice which were used in the protocol; specifically, the *Esr1-Cre* mice  
997 were used as residents, the BALB/c as intruders, and the CD1 as novel conspecifics in a novel/neutral  
998 arena (n=32-64 mice per group, one-way ANOVA with Tukey's test,  $P < 0.0001$  between *Esr1-Cre* and  
999 BALB/c mice,  $P < 0.0001$  between *Esr1-Cre* and CD1 mice).
- 1000 (D) Quantification of aggression levels expressed during a trial throughout the 5 consecutive day RI test  
1001 (5cdRI) in the YFP (control), LTP and LTD groups.
- 1002 (E) Quantification of aggression levels on the first day of the 5cdRI test (n=8 mice per group, two-tailed  
1003 unpaired *t*-test,  $P = 0.1049$  between YFP and LTP groups,  $P = 0.2304$  between YFP and LTD groups).
- 1004 (F) Quantification of aggression levels on the third day of the 5cdRI test (n=8 mice per group, two-tailed  
1005 unpaired *t*-test,  $P = 0.0162$  [observed power=0.989, Cohen's  $D=0.7979$ , difference between  
1006 means= $9.13 \pm 3.34\%$ , 95% CI =1.966 to 16.29] between YFP [lower 95% CI=6.452, higher 95% CI=16.06]  
1007 and LTP [lower 95% CI=14.12, higher 95% CI=26.65] groups,  $P = 0.0017$  between YFP and LTD groups).
- 1008 (G) Quantification of aggression levels on the fifth day of the 5cdRI test (n=8 mice per group, two-tailed  
1009 unpaired *t*-test,  $P = 0.0777$  between YFP and LTP groups,  $P < 0.0001$  between YFP and LTD groups).
- 1010 (H) Quantification of attack latency throughout the 5cdRI in the YFP (control), LTP and LTD groups.
- 1011 (I) Quantification of attack latency on the first day of the 5cdRI test (n=8 mice per group, two-tailed  
1012 unpaired *t*-test,  $P = 0.1406$  between YFP and LTP groups,  $P = 0.3688$  between YFP and LTD groups).
- 1013 (J) Quantification of attack latency on the third day of the 5cdRI test (n=8 mice per group, two-sided  
1014 Mann-Whitney U test,  $P = 0.0415$  [observed power=0.999, Cohen's  $D=0.6072$ , difference between  
1015 means= $159.40 \pm 90.79$  sec, 95% CI =-378.8 to 60.04] between YFP [lower 95% CI=-21.05, higher 95%

1016 CI=407.0] and LTP [lower 95% CI=16.54, higher 95% CI=50.56] groups,  $P = 0.0019$  between YFP and  
1017 LTD groups).

1018 (K) Quantification of attack latency on the fifth day of the 5cdRI test (n=8 mice per group, two-sided  
1019 Mann–Whitney U test,  $P = 0.5054$  between YFP and LTP groups, two-tailed unpaired  $t$ -test,  $P = 0.0052$   
1020 between YFP and LTD groups).

1021 (L) Representative behavior raster plots of YFP, LTP and LTD mouse behavior in novel arena towards a  
1022 novel CD1 conspecific.

1023 (M) Quantification of aggression levels on the sixth day against a CD1 male (n=8 mice per group, two-  
1024 tailed unpaired  $t$ -test,  $P = 0.0387$  [observed power=0.999, Cohen's  $D=0.8980$ , difference between  
1025 means= $9.816 \pm 3.864\%$ , 95% CI=0.6784 to 18.95] between YFP [lower 95% CI=0.8293, higher 95%  
1026 CI=5.768] and LTP [lower 95% CI=5.190, higher 95% CI=21.04] groups, two-sided Mann–Whitney U test,  
1027  $P = 0.0295$  [observed power=0.907, Cohen's  $D=0.7357$ , difference between means= $2.161 \pm 1.069\%$ , 95%  
1028 CI=-4.616 to 0.2938] between YFP [lower 95% CI=0.1860, higher 95% CI=5.052] and LTD groups [lower  
1029 95% CI=-0.2284, higher 95% CI =1.144]).

1030 (N) Quantification of attack latency on the sixth day against a CD1 male (n=8 mice per group, two-tailed  
1031 unpaired  $t$ -test,  $P = 0.0328$  [observed power=0.985, Cohen's  $D=1.0431$ , difference between  
1032 means= $227.00 \pm 82.23$  sec, 95% CI =25.81 to 428.2] between YFP [lower 95% CI=67.01, higher 95%  
1033 CI=477.9] and LTP groups [lower 95% CI=4.196, higher 95% CI=86.63], two-sided Mann–Whitney U test,  
1034  $P > 0.9999$  between YFP and LTD groups).

1035 (O) Quantification of close investigation on the sixth day against a CD1 male (n=8 mice per group, two-  
1036 tailed unpaired  $t$ -test,  $P = 0.6973$  between YFP and LTP groups,  $P = 0.6158$  between YFP and LTD  
1037 groups).

1038 ns; not significant, \* $P < 0.05$ , \*\* $P < 0.01$ , \*\*\* $P < 0.001$ , \*\*\*\* $P < 0.0001$ . In box-and-whisker plots, center  
1039 lines indicate medians, box edges represent the interquartile range, and whiskers extend to the minimal  
1040 and maximal values.

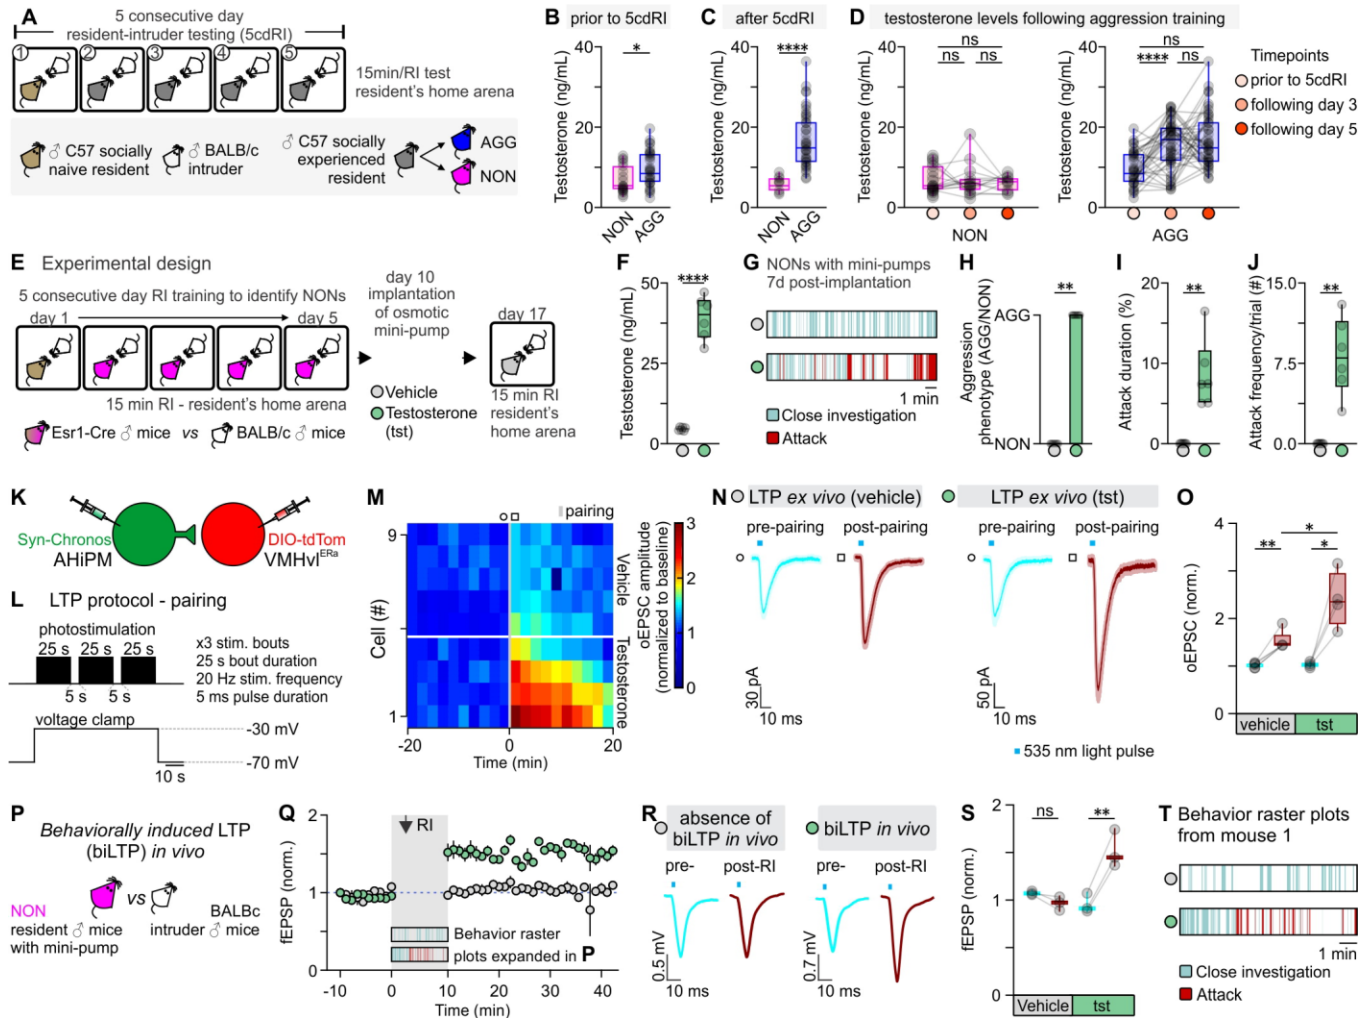

1041

1042 **Fig. 6. Testosterone administration leads to the expression of hypothalamic LTP and aggression**  
 1043 **in previously non-aggressive males.**

1044 (A) Schematic of the experimental design used to identify aggressive (AGG) and non-aggressive (NON)  
 1045 males, from which tails blood samples were collected for quantification of serum testosterone levels.

1046 (B) Serum testosterone levels in NON vs AGG mice prior to any aggression experience (n=24-36 samples  
 1047 per group, two-sided Mann–Whitney U test,  $P = 0.0203$  between NON and AGG groups). Mice were  
 1048 assigned as NON or AGG, according to whether they expressed aggression on the 1<sup>st</sup> day of the 5cdRI  
 1049 test.

1050 (C) Serum testosterone levels in NON vs AGG mice after completion of the 5cdRI test (n=14-46 samples  
1051 per group, two-tailed unpaired *t*-test,  $P < 0.0001$  between NON and AGG groups). Mice that did not  
1052 express any aggression/attack behavior throughout the 5cdRI test they were assigned to the NON group.  
1053 All other mice they were included in the AGG group.

1054 (D) Left – Quantification of serum testosterone levels in NON mice throughout the 5cdRI test (n=14-24  
1055 samples per group, Kruskal-Wallis one-way ANOVA with Dunn's post hoc test,  $P > 0.9999$  between *prior*  
1056 *to 5cdRI* and *following day 3*,  $P > 0.9999$  between *prior to 5cdRI* and *following day 5*, and  $P > 0.9999$   
1057 between *following day 3* and *following day 5* groups). Right – Quantification of serum testosterone levels  
1058 in AGG mice throughout the 5cdRI test (n=36-46 samples per group, one-way ANOVA with Tukey's test,  
1059  $P < 0.0001$  between *prior to 5cdRI* and *following day 3*,  $P < 0.0001$  between *prior to 5cdRI* and *following*  
1060 *day 5*, and  $P = 0.7060$  between *following day 3* and *following day 5* groups).

1061 (E) Schematic of the experimental design used to identify NON mice, and perform subcutaneous  
1062 testosterone mini-pump implantation.

1063 (F) Serum testosterone levels in control vs. testosterone-treated mice (n=6 mice per group, two-tailed  
1064 unpaired *t*-test,  $P < 0.0001$  between vehicle and testosterone).

1065 (G) Representative behavior raster plots of vehicle vs testosterone-treated mice.

1066 (H) Quantification of the number of mice that switched aggression phenotype following vehicle vs  
1067 testosterone administration (n=0/6 in the vehicle-treated group vs n=6/6 in the testosterone treated group,  
1068 two-sided Mann–Whitney U test,  $P = 0.0022$  between vehicle and testosterone).

1069 (I) Quantification of attack duration (n=6 mice per group, two-sided Mann–Whitney U test,  $P = 0.0022$   
1070 between vehicle and testosterone).

1071 (J) Quantification of attack frequency (# attacks/trial; n=6 mice per group, two-sided Mann–Whitney U  
1072 test,  $P = 0.0022$  between vehicle and testosterone).

1073 (K) Schematic of the experimental design used to study the induction and modulation of LTP by  
1074 testosterone in the AHiPM→VMHvl synapse in brain slices from NON mice. Note that slices were taken  
1075 from animals that received T injections, but no behavioral training or other social experience.

1076 (L) Schematic of the LTP induction protocol, utilizing simultaneous photostimulation of the AHiPM  
1077 terminals in VMHvl through the opsin Chronos and depolarization of the VMHvl<sup>Esr1</sup> neuron through voltage  
1078 clamp at -30 mV.

1079 (M) Heat map illustrating the magnitude of LTP induction in VMHvl<sup>Esr1</sup> neurons from vehicle- vs  
1080 testosterone-treated mice.

1081 (N) Average current immediately prior to and following the induction of LTP in vehicle vs testosterone  
1082 conditions (light color envelope is the standard error).

1083 (O) Quantification of the optically evoked excitatory post-synaptic current (oEPSC), prior to and following  
1084 the induction of LTP in vehicle vs testosterone conditions (pre-[lower 95% CI= 0.9508, higher 95%  
1085 CI=1.084] vs post-[lower 95% CI=1.274, higher 95% CI=1.786] pairing in vehicle conditions, n=5 cells  
1086 from 3 mice, two-tailed paired *t*-test, *P* = 0.0038 [observed power=0.992, Cohen's D=2.704, difference  
1087 between means=0.5124±0.0847, 95% CI=0.2771 to 0.7478], pre-[lower 95% CI=0.9349, higher 95%  
1088 CI=1.120] vs post-[lower 95% CI=1.456, higher 95% CI=3.334] pairing in testosterone conditions, n=4  
1089 cells from 3 mice, two-tailed paired *t*-test, *P* = 0.0209 [observed power=0.889, Cohen's D=2.232,  
1090 difference between means=1.368±0.3063, 95% CI=0.3926 to 2.342], post-pairing in vehicle [lower 95%  
1091 CI=1.274, higher 95% CI=1.786] vs testosterone [lower 95% CI=1.456, higher 95% CI=3.334] conditions,  
1092 n=4-5 cells from 6 mice, two-tailed unpaired *t*-test, *P* = 0.0174 [observed power=0.932, Cohen's  
1093 D=0.6388, difference between means=0.8652±0.2974, 95% CI=0.2044 to 1.526]).

1094 (P) Schematic of the experimental design used to trigger and record behaviorally induced LTP *in vivo* in  
1095 NONs.



1096 (Q) Field EPSP amplitude (fEPSP) over time, prior to and following social behavior in the resident intruder  
1097 assay, in vehicle- vs testosterone-treated NON mice (average fEPSP from n=3 mice per group).

1098 (R) Average fEPSP amplitude immediately prior to and following the expression of social behavior in the  
1099 resident intruder assay, in vehicle- vs testosterone-treated NON mice.

1100 (S) Quantification of fEPSP amplitude, prior to and following the induction of LTP in vehicle vs  
1101 testosterone conditions (pre-[lower 95% CI=1.027, higher 95% CI=1.123] vs post-[lower 95% CI=0.7907,  
1102 higher 95% CI=1.143] pairing in vehicle conditions, n=3 mice, two-tailed paired *t*-test, *P* = 0.1020  
1103 [observed power=0.999, Cohen's D=1.6667, difference between means=0.1081±0.0374, 95% CI=-  
1104 0.2692 to 0.05303], pre-[lower 95% CI=0.7055, higher 95% CI=1.209] vs post-[lower 95% CI=1.027,  
1105 higher 95% CI=2.012] pairing in testosterone conditions, n=3 mice, two-tailed paired *t*-test, *P* = 0.0098  
1106 [observed power=0.786, Cohen's D=5.7787, difference between means=0.5625±0.0562, 95% CI=0.3207  
1107 to 0.8043]).

1108 (T) Representative behavior raster plot of the same mouse treated with vehicle and 8 days after with  
1109 testosterone and used for *in vivo* electrophysiology experiments.

1110 ns; not significant, \**P* < 0.05, \*\**P* < 0.01, \*\*\*\**P* < 0.0001. In box-and-whisker plots, center lines indicate  
1111 medians, box edges represent the interquartile range, and whiskers extend to the minimal and maximal  
1112 values. In bar graphs, data are expressed as mean ± s.e.m.

1113

1114 Supplementary Information for

1115 **Experience-dependent plasticity in an innate social behavior is mediated by**  
1116 **hypothalamic LTP**

1117 *Stefanos Stagkourakis*<sup>1\*</sup>, *Giada Spigolon*<sup>2</sup>, *Grace Liu*<sup>1</sup>, *David J. Anderson*<sup>1,3\*</sup>

1118

1119 <sup>1</sup> Division of Biology and Biological Engineering 156-29, Tianqiao and Chrissy Chen Institute for  
1120 Neuroscience, California Institute of Technology, Pasadena, California 91125, USA

1121 <sup>2</sup> Biological Imaging Facility, California Institute of Technology, Pasadena, California 91125, USA

1122 <sup>3</sup> Howard Hughes Medical Institute, California Institute of Technology, 1200 East California Blvd,  
1123 Pasadena, California 91125, USA

1124 **\*Corresponding author information:** Stefanos Stagkourakis, David J. Anderson

1125 **Email:** [stefanos.stagkourakis@caltech.edu](mailto:stefanos.stagkourakis@caltech.edu), [wuwei@caltech.edu](mailto:wuwei@caltech.edu)

1126 **Supplementary Information Text**

1127 **Extended materials and methods**

1128 **Animals.** All mice were housed in ventilated micro-isolator cages in a temperature-controlled environment (median  
1129 temperature 23 °C), under a reversed 12h dark-light cycle, and had *ad libitum* access to food and water. Mouse  
1130 cages were changed weekly on a fixed day on which experiments were not performed.

1131 **Brain slice electrophysiology.** Acute mouse brain slices were prepared. Slices were cut on a vibratome (Leica  
1132 VT1000S) to 300 µm thickness and continuously perfused with oxygenated aCSF containing (in millimolar): NaCl  
1133 (127), KCl (2.0), NaH<sub>2</sub>PO<sub>4</sub> (1.2), NaHCO<sub>3</sub> (26), MgCl<sub>2</sub> (1.3), CaCl<sub>2</sub> (2.4), and D-glucose (10). See also Table S1.  
1134 Whole-cell current- and voltage-clamp recordings were performed with micropipettes filled with intracellular solution  
1135 containing (in millimolar), K-gluconate (140), KCl (10), HEPES (10), EGTA (10), and Na<sub>2</sub>ATP (2) or Cesium  
1136 methanesulfonate (140), KCl (10), HEPES (10), EGTA (10), and Na<sub>2</sub>ATP (2) (pH 7.3 with KOH). Recordings were  
1137 performed using a Multiclamp 700B amplifier, a DigiData 1440 digitizer, and pClamp 11 software (Molecular  
1138 Devices). Slow and fast capacitative components were semi-automatically compensated. Access resistance was  
1139 monitored throughout the experiments, and neurons in which the series resistance exceeded 15 MΩ or changed  
1140 ≥20% were excluded from the statistics. The liquid junction potential was 9.7 mV and not compensated. The  
1141 recorded current was sampled at 20 kHz. Baseline recordings of EPSCs, IPSCs and optogenetically-evoked  
1142 synaptic currents were performed in normal aCSF conditions and in the absence of GABA and NMDA receptor  
1143 blockers. Spontaneous excitatory currents were sampled at the reversal of Cl<sup>-</sup> ( $V_{\text{HOLD}}=-70$  mV), and spontaneous  
1144 inhibitory currents were sampled at the reversal of fast excitatory neurotransmission ( $V_{\text{HOLD}}=0$  mV). All recordings  
1145 were performed at near-physiological temperature (33±1°C). Reagents used in slice electrophysiology experiments;  
1146 Neurobiotin™ tracer (Vector laboratories) was used in combination with Streptavidin conjugated to Alexa Fluor 647.  
1147 MATLAB and OriginPro9 were used for electrophysiological data analysis. CNQX (10 µM), D-AP5 (25 µM), TTX  
1148 (500 nM), and 4-AP (100 mM) were bath applied to block excitatory transmission and to test if optogenetically  
1149 evoked responses are monosynaptic (137). All drugs were pre-applied for 5 min in the slice chamber prior to data  
1150 acquisition.

1151 **Brain slice Ca<sup>2+</sup> imaging.** The spontaneous activity of mouse VMHv<sup>Esr1</sup> neurons was monitored by imaging  
1152 fluorescence changes of the jRCaMP7s biosensor, using a CCD camera (Evolve® 512, Photometrics), mounted on

1153 an Olympus BX51WI microscope. Recordings were 5 min in duration. As a subpopulation of VMHv<sup>Esr1</sup> neurons  
1154 expresses T-type Ca<sup>2+</sup> channels (*unpublished data*), the Ca<sup>2+</sup> transients reported in Fig. 1 likely reflect both action  
1155 potentials and subthreshold synaptic potentials. A 60x water-dipping objective was used to focus on VMHv. Ca<sup>2+</sup>  
1156 imaging analysis was performed using the MIN1PIPE one-photon based calcium imaging signal extraction pipeline  
1157 (138), in combination with custom-written MATLAB routines.

1158 **Cell filling and reconstruction.** Mouse *Esr1*<sup>+</sup> VMHv neurons were recorded in whole-cell mode with intracellular  
1159 pipette solution as above, with the addition of 0.2% neurobiotin. After recording, slices were placed in fixative (4%  
1160 paraformaldehyde/0.16% picric acid), washed in PBS and incubated at 4°C for 72h in a solution containing  
1161 streptavidin conjugated to Alexa Fluor 647. After extensive washing, slices were mounted with 2.5% DABCO in  
1162 glycerol. VMHv<sup>Esr1</sup> neuron identity of all filled cells was confirmed with colocalization studies of viral-induced  
1163 tdTomato expression.

1164 **Ex vivo optogenetics.** Photostimulation during slice whole-cell recordings was performed via a 3.4 watt 535 nm  
1165 LED mounted on the microscope fluorescence light source and delivered through the 60X objective's lens.  
1166 Photostimulation was controlled via the analog outputs of a DigiData 1440A, enabling control over the duration and  
1167 intensity. The photostimulation diameter through the objective lens was ~310 μm with illumination intensity typically  
1168 scaled to 0.35 mW/mm<sup>2</sup>.

1169 **In vivo optogenetics.** Subjects were coupled via a ferrule patch cord to a ferrule on the head of the mouse using  
1170 a zirconia split sleeve (Doric Lenses). Ferrules and fiber-optic patch cords were purchased from Thorlabs and Doric  
1171 Lenses, respectively. The optical fiber was connected to THORLABS fiber-coupled LED (M530F2, 9.6 mW) via a  
1172 fiber-optic rotary joint (FRJ\_1x1\_FC-FC, Doric Lenses) to avoid twisting of the cable caused by the animal's  
1173 movement. Prior to a testing session, following the coupling of the patch cords with the optic fiber ferrules, *Esr1*<sup>Cre/+</sup>  
1174 animals were given 10 min to acclimate in their home cage in the absence of an intruder. The frequency and duration  
1175 of photostimulation were controlled using the programmable train generator Pulse Pal (139). Light power was  
1176 controlled by dialing an analog knob on the LED driver (T-Cube™ LED Driver with Trigger Mode, Thorlabs,  
1177 LEDD1B). Light power was measured from the tip of the ferrule in the patch cord at different laser output settings,  
1178 using an optical power energy meter and a photodiode power sensor (Thorlabs, PM100D, and S130VC). Light  
1179 power was dialed at 0.5 mW at the fiber tip. Upon identification of the fiber placement coordinates in brain tissue

1180 slides, irradiance (light intensity) was calculated using the brain tissue light transmission calculator based on  
1181 (<http://www.stanford.edu/group/dlab/cgi-bin/graph/chart.php>) using laser power measured at the tip and the  
1182 distance from the tip to the target brain region measured by histology. Animals showing no detectable viral  
1183 expression in the target region and/or ectopic fiber placement were excluded from the analysis.

1184 ***In vivo* electrophysiology.** *In vivo* electrophysiology recordings were performed in freely moving mice, using  
1185 chronic silicon probe implants. All extracellular recordings were conducted in the left VMHvl, and all mice included  
1186 in the present study were validated using the following criteria: identification of the lipophilic dye (DiD) tract targeting  
1187 VMHvl, phototagging of VMHvl<sup>Esr1</sup> neurons, and photostimulation-evoked low-latency attack against a conspecific  
1188 through optrode mediated VMHvl<sup>Esr1</sup> neuron photoactivation. Recordings were performed using an optrode based  
1189 on the A1x32-Poly2-10mm-50s-177 NeuroNexus probe and a 100 µm optic fiber placed along the probe's shank  
1190 terminating 50 µm above the probe's first recording sites. Photostimulation was delivered using fiber-coupled  
1191 Thorlabs LEDs (M530F2, 9.6 mW for LTP/LTD studies, and M617F2, 13.2 mW for phototagging), and light power  
1192 was dialed at 0.33 mW at the optrode's fiber tip. The probe was implanted 200 µm above the intended recording  
1193 site, and using the NeuroNexus OH32LP oDrive was lowered over a period of four days to the target coordinates  
1194 (lowering by 50 µm/day). Only channels that showed photo-responses in the local field potential were used for LFP  
1195 analysis. Recordings were performed using the Open Ephys acquisition board with a sampling rate of 30 kHz, the  
1196 Open Ephys I/O board, and the Open Ephys GUI (140). The LTP signal was obtained by applying low pass-filtering  
1197 with a cut-off at 100 Hz on the raw voltage traces.

1198 **Immunohistochemistry.** Mice were anesthetized with ketamine (KetaVed, VEDCO) and xylazine (AnaSed, NDC  
1199 59399-110-20), then transcardially perfused with 20 mL of ice-cold fixative. Whole brains were dissected, immersed  
1200 in ice-cold fixative for 90 min then stored in 0.1M PBS (pH 7.4) containing 20% sucrose, 0.02% bacitracin and  
1201 0.01% sodium azide for three days, before freezing with dry ice. Coronal sections were cut at a thickness of 14 µm  
1202 on a cryostat (Microm, Walldorf) and thaw-mounted onto gelatine-coated glass slides. For GFP staining, brain  
1203 sections were incubated overnight at 4°C using a chicken anti-GFP antibody (Aves Labs, Inc., GFP-1010) at 1:500  
1204 dilution. For tdTomato staining brain sections were incubated overnight at 4°C using a rabbit anti-DsRed antibody  
1205 (Takara, 632392) at 1:500 dilution. Primary antibody incubation was followed by Alexa-488-conjugated goat anti-  
1206 chicken secondary antisera (1:500; Invitrogen), and/or Alexa-568-conjugated donkey anti-rabbit secondary antisera

1207 (1:500; Invitrogen). DAPI solution (1mg/mL) was used at 1:10000 dilution. For further details on reagents, see also  
1208 Table S1.

1209 **Confocal microscopy.** Brain slices were imaged by confocal microscopy (Zeiss, LSM 800). Brain areas were  
1210 determined according to their anatomy using Paxinos and Franklin Brain Atlas (141).

1211 For cell reconstructions, each entire neurobiotin-filled neuron was acquired at 63X (NA = 1.4), 1  $\mu$ m step size using  
1212 a Zeiss LSM880 confocal microscope. Imaris 9.3 (Bitplane) was used to visualize the topology of the dendritic tree  
1213 and the centrifugal branch ordering method was chosen to sort dendrites, assigning order 1 to the root. 2<sup>nd</sup> order  
1214 dendrites were then selected for further imaging acquisition to perform spine quantification. 70-90  $\mu$ m-long dendritic  
1215 segments were acquired at 63X (NA = 1.43), 0.1  $\mu$ m step size and 0.06x0.06 pixel-size using Airy-scan detector at  
1216 the LSM880. Two segments were acquired for dendrites longer than 200  $\mu$ m.

1217 For spine quantification, images of dendritic segments were rendered in Imaris using the *Blend* algorithm and the  
1218 *Filament* module was used to reconstruct dendrites and spines. Specifically, the auto-path method was chosen and  
1219 thinnest spine diameter (between 1.5 and 2  $\mu$ m), maximal distance from the dendrite (between 3 and 8  $\mu$ m) and  
1220 fluorescence intensity threshold were defined in every single dendrite to detect spines. The statistics module in  
1221 Imaris was used to extract spine density values. Three to six segments per neuron were quantified and values were  
1222 averaged.

1223 **Tail-tip whole blood sampling.** Whole blood samples of 40-70  $\mu$ L were collected from the lateral tail vein of  
1224 restrained mice (142). Only blood samples acquired within 2 min post-restraining were used for hormone  
1225 measurements, and the subjects were then returned to their home cage. Briefly, the rodent's tail was immersed for  
1226 30 sec in 40°C water to dilate the tail blood vessels. Immediately after, a 23G needle was used to puncture the  
1227 lateral tail vein, and whole blood was collected. Bleeding was stopped via applying gentle pressure to the tail at the  
1228 level of the puncture with surgical cleaning tissue, and 2% chlorhexidine antiseptic solution was used for tail  
1229 disinfection at the end of the procedure. Blood samples were refrigerated at 4°C for 30 min and then centrifuged at  
1230 4°C at 2000 RCF. Following centrifugation, serum was collected and was frozen at -80°C for a maximal period of 2  
1231 months prior to performing ELISA measurements. All blood samples were acquired during the dark phase of the  
1232 12h/12h light/dark cycle. For further details on reagents, see also Table S1.



1233 **Testosterone ELISA.** 96-well plates were used in a ready-to-use kit for testosterone ELISA (R&D systems –  
1234 Catalog number KGE010). Linear regression was used to fit the optical densities for the standard curve vs the  
1235 concentration. The standard curve range for corticosterone was 300 to 100000 pg/mL. Concentrations were  
1236 calculated from the optical density at 450 nm of each sample. Appropriate sample dilutions were carried out to  
1237 maintain detection in the linear part of the standard curve and typically involved 1 to 10 for mouse serum samples.  
1238 Data acquired from the performed ELISAs are presented as absolute values. Differences between groups were  
1239 identified by Student's *t*-test or ANOVA.

1240 **Viral vectors.** For *ex vivo* Ca<sup>2+</sup> imaging studies of VMHvl neurons, *Esr1Cre/+* male mice were injected in VMHvl  
1241 with 200 nL of AAV9-Syn-FLEX-jGCaMP7s-WPRE (addgene 104491-AAV9) 5.3 × 10<sup>12</sup> genomic copies per mL.  
1242 For *ex vivo* optogenetic studies, *Esr1Cre/+* male mice were injected in VMHvl with 200 nL of AAV9-FLEX-tdTomato  
1243 (addgene 28306-AAV9) 4.2 × 10<sup>12</sup> genomic copies per mL and in AHiPM with 100 nL of AAV5-Syn-Chronos-GFP  
1244 (addgene 59170-AAV5) 3.7 × 10<sup>12</sup> genomic copies per mL. For *in vivo* optogenetic and electrophysiology  
1245 experiments, *Esr1Cre/+* male mice were injected in VMHvl with 100 nL of AAV5-Syn-FLEX-rc[ChrimsonR-  
1246 tdTomato] (addgene 62723-AAV5) 4.1 × 10<sup>12</sup> genomic copies per mL and in AHiPM with 100 nL of AAV5-Syn-  
1247 Chronos-GFP (addgene 59170-AAV5) 3.7 × 10<sup>12</sup> genomic copies per mL. Control groups were injected in VMHvl  
1248 with 100 nL of AAV9-FLEX-tdTomato (addgene 28306-AAV9) 4.2 × 10<sup>12</sup> genomic copies per mL and in AHiPM with  
1249 100 nL of AAV5-CAG-GFP (37825-AAV5) 5.9 × 10<sup>12</sup> genomic copies per mL. For further details on reagents, see  
1250 also Table S1.

1251 **Stereotactic surgery and viral gene transfer.** Adult heterozygous *Esr1Cre/+* males were single-housed for at  
1252 least five days before undergoing surgical procedures and were operated on at 16–20 weeks of age. Mice were  
1253 anesthetized using isoflurane (5% induction, 1–2% maintenance, in 95% oxygen) and placed in a stereotaxic frame  
1254 (David Kopf Instruments). Body temperature was maintained using a heating pad. An incision was made to expose  
1255 the skull for stereotaxic alignment using the inferior cerebral vein and the Bregma as vertical references. We based  
1256 the coordinates for the craniotomy and stereotaxic injection of VMHvl on an anatomical magnetic resonance atlas  
1257 of the mouse brain (AP: –4.68 mm; ML: ±0.78 mm; DV: –5.80 mm), as previously described (47). Virus suspension  
1258 was injected using a pulled-glass capillary at a slow rate of 8–10 nL/min, 100 nl per injection site (Nanojector II,

1259 Drummond Scientific; Micro4 controller, World Precision Instruments). The glass capillary was withdrawn 10 min  
1260 after the cessation of injection.

1261 **Osmotic mini-pumps.** Testosterone was dissolved at 30 mg/ml in sesame oil and was administered for 2 weeks  
1262 at a rate of 0.75 mg/hour via subcutaneous osmotic mini-pumps (Alzet, model 1002) (143-145). For further details  
1263 on reagents, see also Table S1.

1264 **Social behavior assays.** The aggression phenotype of animals defined as aggressive (AGG), or non-aggressive  
1265 (NON) in the present study was based on the expression of aggressive behavior in the five consecutive day resident-  
1266 intruder test (5cdRI). Animals that did not express any aggressive behavior in the 5cdRI were identified as NONs,  
1267 while all AGGs expressed aggression in a minimum of three out of the five trials, with the majority expressing attack  
1268 behavior in all five days. As described in Fig. 1, the 5cdRI composed of a 15 min social interaction test per day in  
1269 the resident's home arena, with socially naïve 4-5 month-old residents. Intruders were BALB/c males 2-3 months  
1270 old and of lower weight/size. Three follow up tests were performed in the 5cdRI experimental design presented in  
1271 Fig. 1, specifically, 2 weeks, 4 weeks and 12 weeks following the completion date of the 5cdRI assay. Note that  
1272 only 15 out of a total of 106 aggressive mice, were used to quantify the effect of aggression training. This was based  
1273 on the finding that following behavioral analysis of the first 15 mice used in the study, the power of the ANOVA test  
1274 reached  $P < 0.0001$ . This suggested that including additional observations would not aid the power of the statistical  
1275 test. In Fig. 5, following the 5cdRI, on day six a social interaction test was performed in a novel home-cage-sized  
1276 arena. In addition to the C57 male, a male with a larger bodyweight/size CD-1 conspecific was introduced. The  
1277 duration of this experiment was 15 min, following which both animals were returned to their home cage.

1278 **Statistics.** No statistical methods were used to predetermine sample sizes but our sample sizes are similar to those  
1279 reported in previous publications (35, 44, 47). Data met the assumptions of the statistical tests used and were tested  
1280 for normality and variance. Normality was determined by D'Agostino–Pearson normality test. All *t*-tests and one-  
1281 way ANOVAs were performed using GraphPad Prism software (Graphpad Software Inc.). Statistical significance  
1282 was set at  $P < 0.05$ .

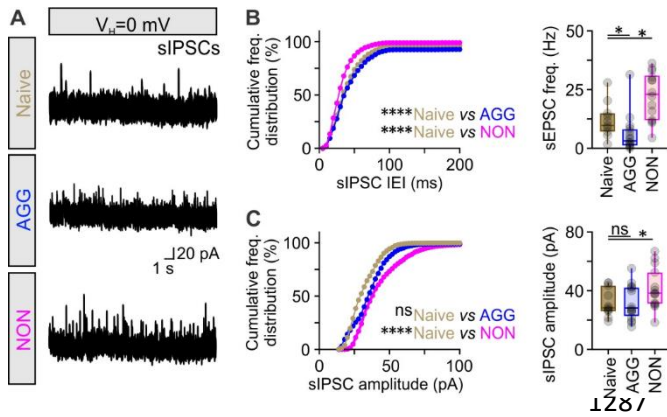

1288 **Fig. S1. Presynaptic plasticity of inhibitory input in VMHvl<sup>Esr1</sup> neurons of non-aggressive male**  
 1289 **mice.**

1290 (A) Representative recordings of spontaneous inhibitory post-synaptic currents (sIPSCs) from VMHvl<sup>Esr1</sup>  
 1291 neurons, from socially naive, aggressive (AGG) and non-aggressive (NON) mice.

1292 (B) Left – cumulative frequency distribution plot of sIPSC inter-event interval (IEI) in voltage-clamp  
 1293 recordings collected from VMHvl<sup>Esr1</sup> neurons from socially naive, AGG and NON mice (n=11-14 VMHvl<sup>Esr1</sup>  
 1294 neuron recording per group, collected from 8-10 mice per group, Kolmogorov-Smirnov test,  $P < 0.0001$   
 1295 between socially naive and AGG mice,  $P < 0.0001$  between socially naive and NON mice). Right –  
 1296 comparison of sIPSC frequency in voltage-clamp recordings collected from VMHvl<sup>Esr1</sup> neurons from  
 1297 socially naive, AGG and NON mice (n=11-14 VMHvl<sup>Esr1</sup> neuron recording per group, collected from 8-10  
 1298 mice per group, Kruskal-Wallis one-way ANOVA with uncorrected Dunn's post hoc test,  $P = 0.0425$   
 1299 between socially naive and AGG mice,  $P = 0.0480$  between socially naive and NON mice).

1300 (C) Left – cumulative frequency distribution plot of sIPSC amplitude in voltage-clamp recordings  
 1301 collected from VMHvl<sup>Esr1</sup> neurons from socially naive, AGG and NON mice (n=11-14 VMHvl<sup>Esr1</sup> neuron  
 1302 recording per group, collected from 8-10 mice per group, Kolmogorov-Smirnov test,  $P = 0.2780$  between  
 1303 socially naive and AGG mice,  $P < 0.0001$  between socially naive and NON mice). Right – comparison of  
 1304 sIPSC amplitude in voltage-clamp recordings collected from VMHvl<sup>Esr1</sup> neurons from socially naive, AGG

1305 and NON mice (n=11-14 VMHv<sup>Esr1</sup> neuron recording per group, collected from 8-10 mice per group,  
1306 Kruskal-Wallis one-way ANOVA with uncorrected Dunn's post hoc test,  $P = 0.8995$  between socially  
1307 naive and AGG mice,  $P = 0.0476$  between socially naive and NON mice).  
1308 ns; not significant,  $*P < 0.05$ ,  $****P < 0.0001$ . In box-and-whisker plots, center lines indicate medians, box  
1309 edges represent the interquartile range, and whiskers extend to the minimal and maximal values.

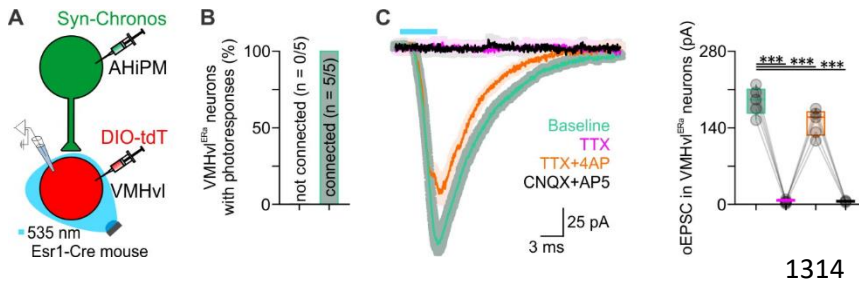

1315 **Fig. S2. Monosynaptic connectivity between AHiPM and VMHv1<sup>Esr1</sup> neurons.**

1316 (A) Schematic illustration of the experimental design, transducing AHiPM neurons with Chronos and  
1317 optically evoking postsynaptic responses in VMHv1<sup>Esr1</sup> neurons *ex vivo*.

1318 (B) Quantification of VMHv1<sup>Esr1</sup> neurons with optically-evoked EPSCs (oEPSCs).

1319 (C) Averaged amplitudes of oEPSCs evoked on baseline (green), TTX (magenta), TTX + 4AP (orange),  
1320 and in CNQX and AP5 (black); n=5 brain slices, collected from n=5 mice, one-way ANOVA with Dunnett's  
1321 post hoc test,  $P = 0.0002$  between baseline and TTX conditions,  $P = 0.0001$  between baseline and  
1322 TTX+4AP conditions,  $P = 0.0002$  between baseline and CNQX+AP5 conditions. Shaded region  
1323 represents the standard error. The vertical scale bar defines current and the horizontal scale bar time.

1324 \*\*\* $P < 0.001$ . In box-and-whisker plots, center lines indicate medians, box edges represent the  
1325 interquartile range, and whiskers extend to the minimal and maximal values.

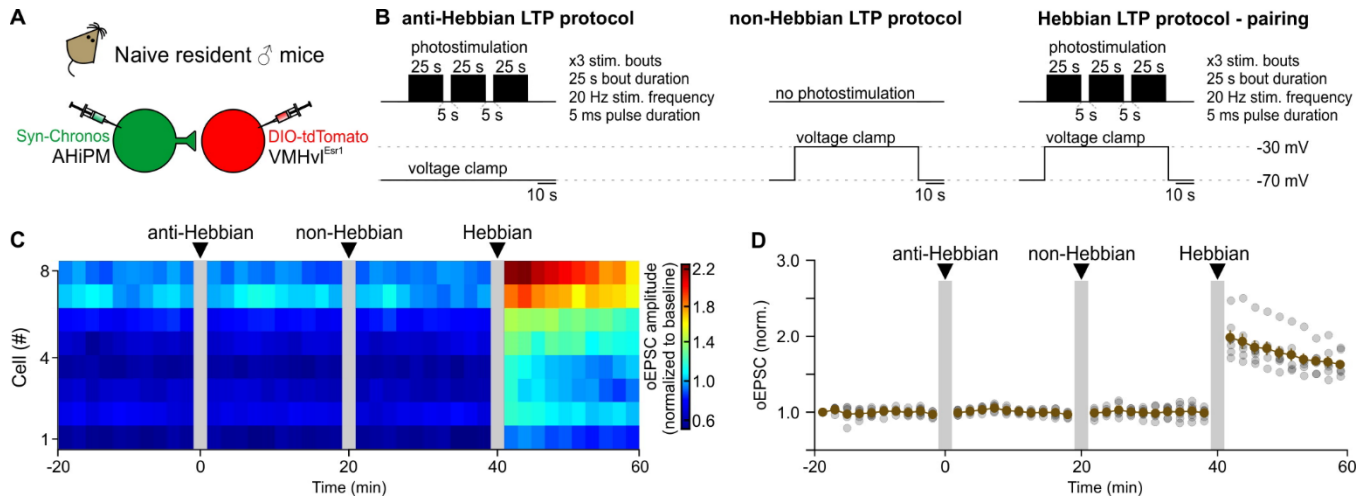

1326

1327 **Fig. S3. Characterization of LTP-inducing stimulation protocols at the AHiPM→VMHvl<sup>Esr1</sup> synapse.**

1328 (A) Schematic of the experimental design used to identify the appropriate stimulation protocol for LTP  
 1329 induction *ex vivo* in socially naïve mice.

1330 (B) Illustration of the experimental protocols tested to to induce LTP in the AHiPM→VMHvl synapse.

1331 (C) Monitoring the optically induced EPSC (oEPSC) prior to, and following application of each of three  
 1332 stimulation protocols (n=8 cells, n=5 socially naïve mice).

1333 (D) Alternative quantification/illustration of optically induced EPSC (oEPSC) prior to, and following  
 1334 application of each of three stimulation protocols (n=8 cells, n=5 socially naïve mice – similar to panel C).

1335



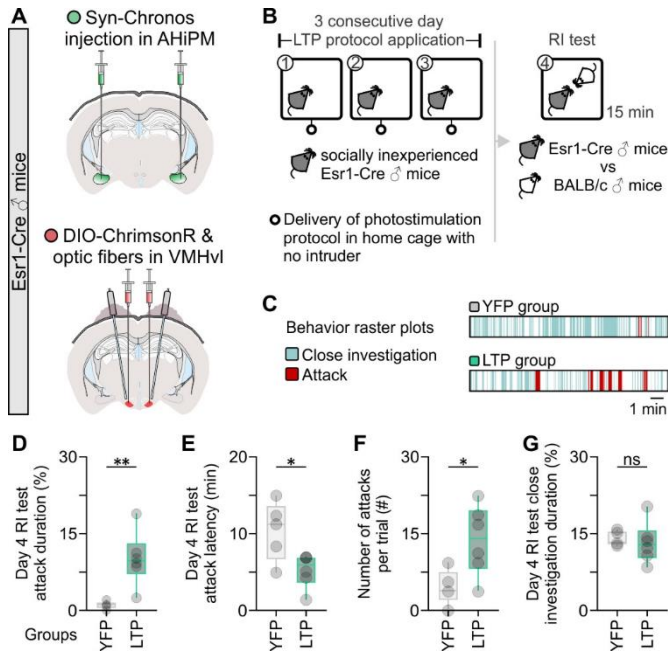

1343

1344 **Fig. S4. Optogenetic induction of LTP at AHiPM→VMHvl<sup>Esr1</sup> synapses in socially naïve mice leads**  
 1345 **to elevated aggression in the first resident-intruder test.**

1346 (A) Schematic indicative of the experimental design used to induced hypothalamic LTP in the  
 1347 AHiPM→VMHvl synapses, via Chronos-eYFP expression in AHiPM, and ChrimsonR expression in  
 1348 VMHvl<sup>Esr1</sup> neurons.

1349 (B) Schematic of the behavior test design used to identify whether induction of LTP in the AHiPM→VMHvl  
 1350 synapses, influences the innate expression of aggression.

1351 (C) Representative behavior raster plots of a control (YFP) and opsin-expressing (LTP) mouse, in the  
 1352 resident-intruder test against a novel BALBc conspecific.

1353 (D) Quantification of attack duration (n=5-6 mice per group, two-tailed unpaired *t*-test, *P* = 0.0046 between  
 1354 YFP and LTP groups).

1355 (E) Quantification of attack latency (n=5-6 mice per group, two-tailed unpaired *t*-test,  $P = 0.0214$  between  
1356 YFP and LTP groups).

1357 (F) Quantification of number of attacks per trial (n=5-6 mice per group, two-tailed unpaired *t*-test,  $P =$   
1358  $0.0235$  between YFP and LTP groups).

1359 (G) Quantification of close investigation duration (n=5-6 mice per group, two-tailed unpaired *t*-test,  $P =$   
1360  $0.7106$  between YFP and LTP groups).

1361 \* $P < 0.05$ , \*\* $P < 0.01$ . In box-and-whisker plots, center lines indicate medians, box edges represent the  
1362 interquartile range, and whiskers extend to the minimal and maximal values.

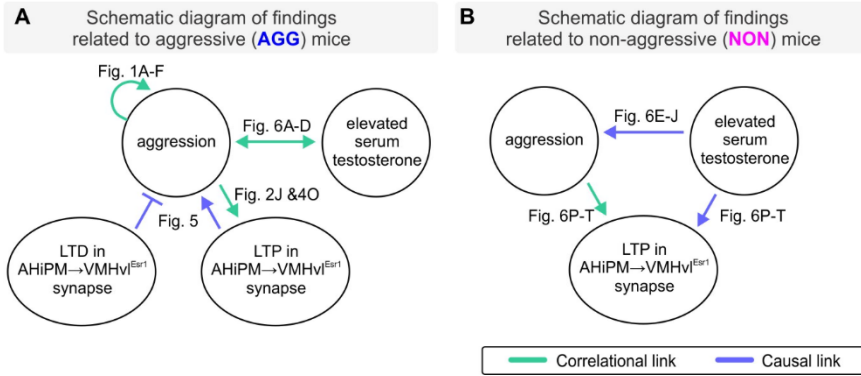

1368

1369 **Fig. S5. Schematic summary.**

1370 (A) The schematic summarizes the findings from AGG mice, and the suggested links between  
1371 aggression, serum testosterone and hypothalamic LTP.

1372 (B) Similar to panel (A), but summarizing results from experiments in NON mice - this schematic  
1373 summarizes the identified links among aggression, serum testosterone and hypothalamic LTP. Our  
1374 results do not distinguish whether the effect of elevated serum testosterone to increase LTP *in vivo* (Fig.  
1375 6P-T) is direct, or rather indirect via an effect to increase aggressive behavior, which in turn enhances  
1376 LTP. However, exogenous administration of T to NON mice (in the absence of any aggressive  
1377 experience) enhances LTP amplitude and persistence as tested *ex vivo* (Fig. 6K-O).

1378 **Materials and Methods**

1379 **Table S1. Reagents and resources.**

| REAGENT or RESOURCE                                   | SOURCE              | IDENTIFIER    |
|-------------------------------------------------------|---------------------|---------------|
| <b>Antibodies</b>                                     |                     |               |
| Rabbit monoclonal anti-DsRed                          | Takara              | 632392        |
| Anti-GFP rabbit serum                                 | Invitrogen          | A-6455        |
| Chicken polyclonal anti-GFP                           | Aves Labs, Inc.     | GFP-1010      |
| Donkey anti-Mouse IgG- Alexa Fluor 488                | ThermoFisher        | A-21202       |
| Donkey anti-Rabbit IgG- Alexa Fluor 488               | ThermoFisher        | A-21206       |
| Donkey anti-Rabbit IgG- Alexa Fluor 568               | ThermoFisher        | A-10042       |
| Donkey anti-Rabbit IgG- Alexa Fluor 647               | ThermoFisher        | A-31573       |
| Goat anti-Chicken IgY- Alexa Fluor 488                | ThermoFisher        | A-11039       |
| Biotinylated Goat Anti-Rabbit IgG Antibody            | Vector Laboratories | BA-1000       |
| Donkey anti-Rabbit IgG- Alexa Fluor 568               | ThermoFisher        | A-10042       |
| <b>Chemicals, Peptides, and Recombinant Proteins</b>  |                     |               |
| Picric acid                                           | Sigma-Aldrich       | P6744         |
| 4% paraformaldehyde (PFA) in PBS                      | Santa Cruz Biotech. | CAS30525-89-4 |
| Streptavidin conjugated to Alexa Fluor 647            | ThermoFisher        | CS32357       |
| Neurobiotin tracer                                    | VectorLabs          | SP-1120-50    |
| Sodium chloride                                       | Sigma-Aldrich       | S9888         |
| Sodium bicarbonate                                    | Sigma-Aldrich       | S6297         |
| D-(+)-Glucose                                         | Sigma-Aldrich       | G7528         |
| Sodium phosphate monobasic dihydrate                  | Sigma-Aldrich       | 71505         |
| Potassium chloride                                    | Sigma-Aldrich       | P9333         |
| Magnesium sulfate heptahydrate                        | Sigma-Aldrich       | 63138         |
| Calcium chloride dihydrate                            | Sigma-Aldrich       | C5080         |
| 4-Aminopyridine                                       | Sigma-Aldrich       | 275875        |
| CNQX disodium salt                                    | TOCRIS              | 1045          |
| D-AP5                                                 | TOCRIS              | 0106          |
| Tetrodotoxin citrate                                  | Alomone labs        | T-550         |
| DAPI solution (1mg/mL)                                | ThermoFisher        | 62248         |
| OCT Cryomount                                         | Histolab            | 45830         |
| Normal donkey serum (NDS)                             | Sigma-Aldrich       | D9663         |
| Bovine Serum Albumin (BSA)                            | Sigma-Aldrich       | A2153         |
| Triton X-100                                          | Sigma-Aldrich       | T8787         |
| Sucrose                                               | Sigma-Aldrich       | S7903         |
| DiD' solid                                            | Invitrogen          | D7757         |
| Vectastain ABC kit                                    | Vector Laboratories | PK-6100       |
| 3,3-Diaminobenzidine tetrahydrochloride hydrate (DAB) | Sigma-Aldrich       | D5637         |
| Testosterone                                          | Sigma-Aldrich       | T1500         |
| Sesame oil                                            | Sigma-Aldrich       | S3547-250ML   |
| Phosphate buffer saline (PBS)                         | Santa Cruz Biotech. | SC-24946      |

| <b>ELISA kit</b>                              |                             |                                                                                                                       |
|-----------------------------------------------|-----------------------------|-----------------------------------------------------------------------------------------------------------------------|
| Testosterone Parameter Assay Kit              | R&D systems                 | KGE010                                                                                                                |
| <b>Experimental Models: Organisms/Strains</b> |                             |                                                                                                                       |
| <i>Esr1<sup>Cre/+</sup></i>                   | Lee et al., 2014            | Own breeding                                                                                                          |
| BALB/cAnNCr mouse line                        | Charles River               | <a href="https://www.criver.com/">https://www.criver.com/</a>                                                         |
| CrI:CD1(ICR)                                  | Charles River               | <a href="https://www.criver.com/">https://www.criver.com/</a>                                                         |
| <b>AAV mediated gene transfer</b>             |                             |                                                                                                                       |
| AAV5-CAG-GFP                                  | addgene                     | 37825-AAV5                                                                                                            |
| AAV9-FLEX-tdTomato                            | addgene                     | 28306-AAV9                                                                                                            |
| AAV5-Syn-Chronos-GFP                          | addgene                     | 59170-AAV5                                                                                                            |
| AAV5-Syn-FLEX-rc[ChrimsonR-tdTomato]          | addgene                     | 62723-AAV5                                                                                                            |
| AAV9-Syn-FLEX-jGCaMP7s-WPRE                   | addgene                     | 104491-AAV9                                                                                                           |
| <b>Software</b>                               |                             |                                                                                                                       |
| Clampfit 11                                   | MOLECULAR DEVICES           | <a href="https://www.moleculardevices.com/">https://www.moleculardevices.com/</a>                                     |
| MATLAB 2018                                   | MathWorks                   | <a href="https://www.mathworks.com/">https://www.mathworks.com/</a>                                                   |
| OriginPro 9                                   | OriginLab                   | <a href="https://www.originlab.com/">https://www.originlab.com/</a>                                                   |
| ImageJ                                        | NIH; Schneider et al., 2012 | <a href="https://imagej.nih.gov/ij/">https://imagej.nih.gov/ij/</a>                                                   |
| Prism 8                                       | GraphPad                    | <a href="https://www.graphpad.com/scientific-software/prism/">https://www.graphpad.com/scientific-software/prism/</a> |
| Illustrator CC 2020                           | Adobe Systems               | <a href="http://www.adobe.com">http://www.adobe.com</a>                                                               |
| CorelDrawX8                                   | CorelDRAW graphics suite    | <a href="https://www.coreldraw.com/">https://www.coreldraw.com/</a>                                                   |
| Photoshop 2020                                | Adobe Systems               | <a href="http://www.adobe.com">http://www.adobe.com</a>                                                               |

1380

1381
